# Supplementary material for: First-line treatments for advanced renal-cell carcinoma with immune checkpoint inhibitors: systematic review, network meta-analysis and cost-effectiveness analysis
Source: PubMed Central journal article supplement — Ther Adv Med Oncol. 2020 Aug 17;12:1758835920950199. doi: 10.1177/1758835920950199 (PMC7436799; doi:10.1177/1758835920950199), 2020-08-17
Supplement: CEA_appendix_4-13.pdf [file CEA_appendix_4-13.pdf]

1 **Contents of Appendix files, figures and tables**

2  
3  
4  
5  
6  
7  
8  
9  
10  
11  
12  
13  
14  
15  
16  
17  
18  
19  
20  
21  
22  
23  
24  
25  
26  
27  
28  
29  
30  
31  
32  
33  
34  
35  
36  
37  
38  
39  
40  
41  
42  
43  
44

Appendix file 1: supplementary method of meta-analysis.....2  
Appendix file 2: supplementary method 1 of cost-effectiveness analysis.....4  
Appendix Figure 1.....10  
Appendix Figure 2.....11  
Appendix Figure 3.....12  
Appendix Figure 4.....13  
Appendix Figure 5.....14  
Appendix Figure 6.....15  
Appendix Figure 7.....15  
Appendix Figure 8.....16  
Appendix Figure 9.....16  
Appendix Figure 10.....17  
Appendix Figure 11.....18  
Appendix Figure 12.....19  
Appendix Figure 13.....20  
Appendix Figure 14.....21  
Appendix Table 1.....22  
Appendix Table 2.....26  
Appendix Table 3.....30  
Appendix Table 4.....31  
Appendix Table 5.....32  
Appendix Table 6.....34  
Appendix Table 7.....35  
Appendix Table 8.....36  
Appendix Table 9.....37

1 **Appendix file 1: supplementary method of meta-analysis**

2

3 1.1 Search strategies for PubMed, EMBASE and Cochrane database

4

5 PubMed: 255 results

6

7 ("pembrolizumab" [Supplementary Concept] OR "lambrolizumab"[Title/Abstract] OR  
8 "Keytruda"[Title/Abstract] OR "MK-3475"[Title/Abstract] OR

9 "nivolumab"[Supplementary Concept] OR "MDX-1106"[Title/Abstract] OR "ONO-  
10 4538"[Title/Abstract] OR "BMS-936558"[Title/Abstract] OR "Opdivo"[Title/Abstract] OR

11 "atezolizumab"[Supplementary Concept] OR "anti-PDL1"[Title/Abstract] OR  
12 "MPDL3280A"[Title/Abstract] OR "Tecentriq"[Title/Abstract] OR "RG7446"[Title/Abstract] OR  
13 "RG-7446"[Title/Abstract] OR

14 "Durvalumab" [Supplementary Concept] OR "Durvalumab" [Title/Abstract] OR  
15 "MEDI4736"[Title/Abstract] OR "MEDI-4736"[Title/Abstract] OR "Imfinzi"[Title/Abstract] OR

16 "Avelumab"[Supplementary Concept] OR "Avelumab" [Title/Abstract] OR  
17 "Bavencio"[Title/Abstract] OR "MSB0010718C"[Title/Abstract]

18 OR "anti-PD1"[Title/Abstract] OR "PD-1"[Title/Abstract] OR "Programmed Death  
19 1"[Title/Abstract] OR "Programmed Cell Death 1 Receptor"[Title/Abstract] OR "PD  
20 1"[Title/Abstract] OR "PD1"[Title/Abstract] OR "Programmed Death-Ligand 1"[Title/Abstract]  
21 OR "PD-L1"[Title/Abstract]

22 OR "programmed cell death 1 ligand 1 protein"[Title/Abstract] OR "PD L1"[Title/Abstract] OR  
23 "PDL1"[Title/Abstract])

24 AND ((renal[Title/Abstract] OR Kidney[Title/Abstract]) AND ((RCC[Title/Abstract] OR  
25 mRCC[Title/Abstract] OR aRCC[Title/Abstract] OR RCC[Title/Abstract]) OR

26 "MALIGNANC"[Title/Abstract] OR "TUMO"[Title/Abstract] OR "NEOPLAS"[Title/Abstract]  
27 OR "carcinoma"[Title/Abstract] OR "ADENOCARCINOMA"[Title/Abstract]) OR "Carcinoma,

28 Renal Cell"[Mesh] OR "Kidney Neoplasms"[Mesh] )

29 AND (("clinical trials as topic"[MeSH Terms] OR "trial"[Title/Abstract] OR  
30 "study"[Title/Abstract]))

31

32 EMBase: 135 results

33 ('pembrolizumab'/exp OR 'lambrolizumab':ab,ti OR 'Keytruda':ab,ti OR 'MK-3475':ab,ti OR  
34 'nivolumab'/exp OR 'MDX-1106':ab,ti OR 'ONO-4538':ab,ti OR 'BMS-936558':ab,ti OR

35 'Opdivo':ab,ti OR 'atezolizumab'/exp OR 'anti-PDL1':ab,ti OR 'MPDL3280A':ab,ti OR

36 'Tecentriq':ab,ti OR 'RG7446':ab,ti OR 'RG-7446':ab,ti OR 'Durvalumab':ab,ti OR  
37 'MEDI4736':ab,ti OR 'MEDI-4736':ab,ti OR 'Imfinzi':ab,ti OR 'Avelumab':ab,ti OR

38 'MSB0010718C':ab,ti OR 'Bavencio':ab,ti

39 OR 'anti-PD1':ab,ti OR 'PD-1':ab,ti OR 'Programmed Death 1':ab,ti OR 'Programmed Cell Death  
40 1 Receptor':ab,ti OR 'PD-1':ab,ti OR 'PD1':ab,ti OR 'Programmed Death-Ligand 1':ab,ti OR 'PD-  
41 L1':ab,ti OR 'programmed cell death 1 ligand 1 protein':ab,ti OR 'PD L1' :ab,ti OR 'PDL1':ab,ti)

42 AND (('Renal Cell Carcinoma'/exp OR (('renal':ab,ti OR 'kidney':ab,ti) AND (('RCC':ab,ti OR  
43 'mRCC':ab,ti OR 'aRCC':ab,ti) OR 'carcinoma':ab,ti OR 'ADENOCARCINOMA':ab,ti OR

44 'Tumor':ab,ti OR 'NEOPLASma':ab,ti OR 'MALIGNANCY':ab,ti))))

1 AND ('randomized controlled trial'/exp)  
2  
3  
4 Cochrane: 290 results, 278 trials  
5 #1 MeSH descriptor: [Carcinoma, Renal Cell] explode all trees  
6 #2 MeSH descriptor: [Kidney Neoplasms] explode all trees  
7 #3 ("renal" OR "Kidney") AND ("carcinoma" OR "ADENOCARCINOMA" OR "Tumor" OR  
8 "Cancer" OR "NEOPLASma" OR "MALIGNANCy" OR "mRCC" OR "aRCC" OR "RCC")  
9 #4 "pembrolizumab" or "lambrolizumab" or "Keytruda" or "MK-3475" or "nivolumab" or "MDX-  
10 1106" or "ONO-4538" or "BMS-936558" or "Opdivo" or "atezolizumab" or "anti-PDL1" or  
11 "MPDL3280A" or "Tecentriq" or "RG7446" or "RG-7446" or "Durvalumab" or "Avelumab" or  
12 "Bavencio" or "MSB0010718C" or "anti-PD1" or "PD-1"  
13 or "Programmed Death 1" or "Programmed Cell Death 1 Receptor" or "PD 1" or "PD1" or  
14 "Programmed Death-Ligand 1" or "PD-L1" or "programmed cell death 1 ligand 1 protein" or "PD  
15 L1" or "PDL1"  
16 #5 (#1 OR #2 OR #3) AND #4  
17  
18  
19  
20  
21  
22  
23  
24  
25  
26  
27  
28  
29  
30  
31  
32  
33  
34  
35  
36  
37  
38  
39  
40  
41  
42  
43  
44

## 1 Appendix file 2: supplementary method 1 of cost-effectiveness analysis

### 2 3 2. Materials and Methods

#### 4 2.1. Model structure

5 A Markov model was developed to evaluate the costs and health outcomes of treating aRCC  
6 with sunitinib, atezolizumab plus bevacizumab, nivolumab plus ipilimumab, pembrolizumab plus  
7 axitinib, and avelumab plus axitinib. The model included the following three discrete health states  
8 reflecting different characteristics of the disease: PFS, progressed survival (PS) and death (appendix  
9 figure 5). The time in each health state was estimated using partition survival methods (i.e., area  
10 under the survival curves). Because the treatment schedules in the CheckMate 214, KEYNOTE-  
11 426, IMmotion 151 and JAVELIN Renal 101 trials were arranged by using week as the unit, the  
12 cycle length of the Markov model was set to be one week <sup>1-4</sup>. The time horizon was 10 years in the  
13 base-case analysis, and the initial health state for all of the patients was PFS <sup>5</sup>. The impact of the  
14 time horizon was evaluated in the sensitivity analysis. During each one-week cycle, the patients  
15 either remained in their assigned health state or progressed to a new health state. It was assumed  
16 that patients cannot return to previous health states. The following hypothetical patient  
17 demographics when entering the model matched those of the patients in the CheckMate 214,  
18 KEYNOTE-426, IMmotion 151 and JAVELIN Renal 101 trials: 62 years old and 72.8% male, with  
19 previously untreated aRCC with a clear-cell component. <sup>1</sup> Model development and data analysis  
20 were performed in the R statistical environment (version 3.5.2; R Development Core Team, Vienna,  
21 Austria).

22 The main outcomes were expected life years (LYs), QALYs and cost. Cost and QALYs were  
23 discounted at an annual rate of 3% in the US. The costs are shown in 2017 US dollars. ICERs were  
24 examined and are presented as cost per additional QALY gained. According to the published  
25 literature, the cost-effectiveness threshold in the US was \$150,000 <sup>6,7</sup>.

#### 26 27 28 2.1. Clinical data

29 Clinical efficacy and safety data were obtained from the CheckMate 214, KEYNOTE-426,  
30 IMmotion 151 and JAVELIN Renal 101 trials <sup>1-4</sup>. By using the method described by Guyot *et al* <sup>8</sup>,  
31 we replicated the individual PFS and OS data of the overall population in the CheckMate 214,  
32 KEYNOTE-426, IMmotion 151 and JAVELIN Renal 101 trials after the Kaplan–Meier curves were  
33 extracted and digitized with the GetData Graph Digitizer version 2.26. Virtual patient-level data  
34 comprised event and censor times and were equal in number to the initial number at risk, which was  
35 closely reproduced the digitized Kaplan–Meier curves. The PFS and OS plots created by using the  
36 virtual patient-level data and the predicted curves by using parametric survival models are shown  
37 in appendix figures 6-9.

38 Due to the comparable characteristics of the patients and the absence of a significant difference  
39 in PFS in the sunitinib arm between the CheckMate 214, KEYNOTE-426, IMmotion 151 and  
40 JAVELIN Renal 101 trials, we pooled the virtual patient-level data in the sunitinib arm of the four  
41 clinical trials and fitted the PFS and OS data by the log-logistic distribution according to the results  
42 of the goodness of fit measured by the Akaike information criterion (AIC) statistic (appendix figure  
43 10). The estimated parameters of the log-logistic distribution are shown in appendix table 5. We  
44 estimated the OS rates of atezolizumab plus bevacizumab, nivolumab plus ipilimumab,

1 pembrolizumab plus axitinib, and avelumab plus axitinib strategies by multiplying the survival  
2 probabilities in the sunitinib treatment and the HRs of ICI regimens against sunitinib treatment in  
3 the overall population, which were derived from the results of our network meta-analysis (Figure 1  
4 and 2 in the article).

5 In subgroup analysis for PD-L1-positive and -negative patients, the PFS and OS probabilities  
6 of PD-L1-positive and -negative patients in the atezolizumab plus bevacizumab, nivolumab plus  
7 ipilimumab, pembrolizumab plus axitinib, and avelumab plus axitinib arms were also calculated by  
8 multiplying the survival probabilities in the sunitinib treatment and the HRs of ICI regimens against  
9 sunitinib treatment in the PD-L1-positive and -negative tumours, respectively. These HRs for PFS  
10 and OS in PD-L1-positive and -negative patients were derived from the results of our network meta-  
11 analysis (Figure 1 and 2 in the article). It was assumed that the PFS probabilities of sunitinib  
12 treatment in PD-L1-positive and negative patients is similar with the overall population because  
13 there were no significant differences in PFS between PD-L1-positive patients and the overall  
14 population in the IMmotion 151 and JAVELIN Renal 101 trials (appendix figures 11A , 11B and  
15 11C). However, because a significant difference in OS between PD-L1-positive and negative  
16 patients in the CheckMate 214 trial (appendix figure 11D) was observed, we estimated the OS of  
17 the sunitinib treatment in the PD-L1-positive/negative tumours by multiplying the survival  
18 probabilities in the overall population and the HRs of positive/negative tumours against the overall  
19 population. Based on the virtual patient-level data of CheckMate 214 and IMmotion 151 trial, the  
20 estimated HRs of sunitinib treatment of PD-L1-positive and negative patients versus overall  
21 population were 1.20 (95% CI: 0.62 - 1.12) and 0.90 (95% CI: 0.88 -1.41), respectively.

22 The durations of the PFS and progression of disease (PD) phases in four competing strategies  
23 were calculated using the area under the PFS and OS survival curves. The difference between the  
24 OS and PFS estimated from the survival distribution models was used to calculate the probability  
25 from PFS to death.<sup>9</sup> After the disease progressed, the proportion of patients who received second-  
26 line active treatment was collected from the CheckMate 214, KEYNOTE-426, IMmotion 151 and  
27 JAVELIN Renal 101 trials<sup>1-4</sup>.

### 28 29 2.3. Cost and utility estimates

30 This analysis adopted the third-party payer perspective in the US, which considered only direct  
31 medical costs, including first- and second-line treatment, management of treatment-related serious  
32 adverse events (SAEs), routine follow-ups and monitoring, best supportive care (BSC) and terminal  
33 care (table 1). The costs were reported in 2017 US dollars. The costs associated with health care  
34 services were inflated to 2017 values according to the US consumer price index<sup>10</sup>.

35 Based on the CheckMate 214, KEYNOTE-426, IMmotion 151 and JAVELIN Renal 101 trials,  
36 sunitinib was prescribed at a dose of 50 mg/day for 4 weeks followed by 2 weeks without treatment  
37<sup>1-4</sup>. The intensity of sunitinib was 83.9% (range: 67% - 100%)<sup>2,11</sup>. Nivolumab and ipilimumab were  
38 administered intravenously at doses of 3 mg/kg and 1 mg/kg, respectively, every 3 weeks for four  
39 doses (induction phase), followed by nivolumab monotherapy at a dose of 3 mg/kg every 2 weeks  
40 (maintenance phase). Avelumab was administered at a dose of 10 mg/kg every 2 weeks, and  
41 pembrolizumab was administered intravenously at a dose of 200 mg once every 3 weeks. Axitinib  
42 was administered orally at a starting dose of 5 mg twice daily on a continuous dosing schedule.  
43 Atezolizumab and bevacizumab were administered intravenously at a dose of 1200 mg and 15  
44 mg/kg every 3 weeks. To calculate the doses of the agents based on body weight, we assumed a

1 typical patient weighed 71.4 kg in the US, and the range (29-112 kg) was used in the sensitivity  
2 analysis<sup>12-14</sup>. Based on previous reports, the maximum treatment duration of nivolumab plus  
3 ipilimumab was two years<sup>13,15</sup>. Because the median relative dose intensity of sunitinib and axitinib  
4 was 83.9% and 89.4% as JAVELIN Renal 101 trial reported, we estimated the daily cost of sunitinib  
5 and axitinib based on the fully dose. The prices of sunitinib, pembrolizumab, avelumab, nivolumab,  
6 ipilimumab, atezolizumab, bevacizumab and axitinib in the US (average wholesale price) were  
7 collected from public databases and the literature<sup>16</sup>. Other cost data were collected from the  
8 published literature<sup>14-26</sup>.

9 The analysis included the following grade 3/4 AEs that had notably different probabilities  
10 between the arms of the CheckMate 214, KEYNOTE-426, IMmotion 151 and JAVELIN Renal 101  
11 trials: fatigue, hypertension, anaemia, palmar–plantar erythrodysesthesia and thrombocytopenia<sup>1-4</sup>.  
12 The recommended management of AEs could be found in the clinical guidelines<sup>27,28</sup>. The costs of  
13 managing AEs per event in the US were extracted from the literature<sup>19-21,25,26,29-31</sup>.

14 The mean health utility scores for the PFS and PD states were derived from the published  
15 literature (table 1)<sup>14,23,32,33</sup>. The disutility values due to grade 1/2 and 3/4 AEs were included in  
16 this analysis<sup>32</sup>.

#### 17 18 2.4. Sensitivity and Scenario analysis

19 One-way and probabilistic sensitivity analyses were used to test the uncertainty in the model.  
20 In the one-way sensitivity analyses, to identify key model input parameters that had substantial  
21 impact on the model outcome, the relevant parameters were individually adjusted to their respective  
22 low and high values, which are listed and illustrated in table 1. The ranges of the parameters used  
23 in the one-way sensitivity analyses were obtained from the published literature; when reported data  
24 were not available, a range  $\pm 25\%$  of the base-case value was used. An assumed 50% discount of the  
25 price of sunitinib, ipilimumab and nivolumab was used for one-way sensitivity analyses. The results  
26 of the one-way sensitivity analyses are presented in a tornado diagram. For the PSAs, the parameters  
27 were sampled using the Monte Carlo method to run 1,000 replicated outcomes. Based on the ISPOR-  
28 SMDM Modeling Good Research Practices Task Force report on model parameter estimation and  
29 uncertainty, the values of the input parameters were sampled from lognormal distributions for costs  
30 and relative risks, and from  $\beta$  distributions for utility values and probabilities or proportions with an  
31 assumed standard deviation of 25% from the mean values<sup>34</sup>. The price of sunitinib, ipilimumab and  
32 nivolumab were fixed in the PSA since they are branded drugs. Cost-effectiveness acceptability  
33 curves were generated to present the probabilities of cost-effectiveness.

34 In the scenario analysis, we checked the impact of an updated nivolumab dosing schedule, a  
35 single 480 mg iv. dose every 4 weeks<sup>35</sup> on the economic outcomes. The impact caused by the time  
36 horizon would also be tested.

37 To enhance the transferability of the findings, we also evaluated the cost-effectiveness of ICI  
38 regimens in the setting of a representative European country (United Kingdom) from the National  
39 Health Service perspective and a middle-income country (China) from the health care perspectives  
40 by using scenario analysis. The costs are also shown in 2017 US dollars (appendix table 6). GBP  
41 and the Chinese Yuan were converted into US dollars by using the following exchange formulas:  
42 1US \$ = GBP 0.7075, and 1US \$ = CNY 6.8. The UK costs associated with health care services  
43 were inflated to 2017 values according to the UK consumer price index<sup>22</sup>. As in a previous study,  
44 we took the average increase in the index for the previous three years when the local index was

1 unavailable <sup>22</sup>. Because the Chinese health care costs were controlled by the government and kept  
2 stable, the Chinese costs were not inflated in the current analysis. The cost and QALYs were  
3 discounted at an annual rate of 3.5% in the United Kingdom and 5% in China <sup>13,36</sup>. ICERs were  
4 examined and presented as cost per additional QALY gained. According to the published literature,  
5 the cost-effectiveness thresholds in the UK and China were \$65,000 and \$27,351 (3× the per capita  
6 gross domestic product of China in 2017), respectively<sup>13,36</sup>.

### References:

- 11 1. Motzer RJ, Tannir NM, McDermott DF, et al. Nivolumab plus Ipilimumab versus Sunitinib in  
12 Advanced Renal-Cell Carcinoma. *New Engl J Med*. 2018;378:1277-1290.
- 13 2. Motzer RJ, Penkov K, Haanen J, et al. Avelumab plus Axitinib versus Sunitinib for Advanced  
14 Renal-Cell Carcinoma. *New Engl J Med*. 2019.
- 15 3. Rini BI, Plimack ER, Stus V, et al. Pembrolizumab plus Axitinib versus Sunitinib for Advanced  
16 Renal-Cell Carcinoma. *New Engl J Med*. 2019.
- 17 4. Rini BI, Powles T, Atkins MB, et al. Atezolizumab plus bevacizumab versus sunitinib in patients  
18 with previously untreated metastatic renal cell carcinoma (IMmotion151): a multicentre, open-label,  
19 phase 3, randomised controlled trial. *Lancet*. 2019.
- 20 5. Abdel-Rahman O. Clinical correlates and prognostic value of different metastatic sites in metastatic  
21 renal cell carcinoma. *Future Oncol*. 2017.
- 22 6. Neumann PJ, Cohen JT, Weinstein MC. Updating cost-effectiveness--the curious resilience of the  
23 \$50,000-per-QALY threshold. *N Engl J Med*. 2014;371:796-797.
- 24 7. Nimdet K, Chaiyakunapruk N, Vichansavakul K, Ngorsuraches S. A systematic review of studies  
25 eliciting willingness-to-pay per quality-adjusted life year: does it justify CE threshold? *Plos One*.  
26 2015;10:e122760.
- 27 8. Guyot P, Ades AE, Ouwens MJ, Welton NJ. Enhanced secondary analysis of survival data:  
28 reconstructing the data from published Kaplan-Meier survival curves. *Bmc Med Res Methodol*.  
29 2012;12:9.
- 30 9. Chouaid C, Luciani L, LeLay K, et al. Cost-Effectiveness Analysis of Afatinib versus Gefitinib for  
31 First-Line Treatment of Advanced EGFR-Mutated Advanced Non-Small Cell Lung Cancers. *J Thorac*  
32 *Oncol*. 2017.
- 33 10. US Department of Labor. Calculators. [https://www.bls.gov/data/inflation\\_calculator.htm](https://www.bls.gov/data/inflation_calculator.htm).  
34 [Accessed January 5, 2019].
- 35 11. Delea TE, Amdahl J, Diaz J, Nakhaipour HR, Hackshaw MD. Cost-effectiveness of pazopanib  
36 versus sunitinib for renal cancer in the United States. *J Manag Care Spec Pharm*. 2015;21:46-54, 54a.
- 37 12. Akaza H, Naito S, Ueno N, et al. Real-world use of sunitinib in Japanese patients with advanced  
38 renal cell carcinoma: efficacy, safety and biomarker analyses in 1689 consecutive patients. *Jpn J Clin*  
39 *Oncol*. 2015;45:576-583.
- 40 13. Sarfaty M, Leshno M, Gordon N, et al. Cost Effectiveness of Nivolumab in Advanced Renal Cell  
41 Carcinoma. *Eur Urol*. 2018;73:628-634.
- 42 14. McCrea C, Johal S, Yang S, Doan J. Cost-effectiveness of nivolumab in patients with advanced  
43 renal cell carcinoma treated in the United States. *Exp Hematol Oncol*. 2018;7:4.
- 44 15. Meng Y, Hertel N, Ellis J, et al. The cost-effectiveness of nivolumab monotherapy for the treatment

1 of advanced melanoma patients in England. *Eur J Health Econ*. 2018.

2 16. RED BOOK Online. <http://www.micromedexsolutions.com>. [Accessed 24 March 2019].

3 17. Benedict A, Figlin RA, Sandstrom P, et al. Economic evaluation of new targeted therapies for the  
4 first-line treatment of patients with metastatic renal cell carcinoma. *Bju Int*. 2011;108:665-672.

5 18. Henk HJ, Chen C, Benedict A, Sullivan J, Teitelbaum A. Retrospective claims analysis of best  
6 supportive care costs and survival in a US metastatic renal cell population. *Clinicoecon Outcomes Res*.  
7 2013;5:347-354.

8 19. Perrin A, Sherman S, Pal S, et al. Lifetime cost of everolimus vs axitinib in patients with advanced  
9 renal cell carcinoma who failed prior sunitinib therapy in the US. *J Med Econ*. 2015;18:200-209.

10 20. Hansen RN, Hackshaw MD, Nagar SP, et al. Health care costs among renal cancer patients using  
11 pazopanib and sunitinib. *J Manag Care Spec Pharm*. 2015;21:37-44, 44a.

12 21. Liou SY, Stephens JM, Carpiuc KT, Feng W, Botteman MF, Hay JW. Economic burden of  
13 haematological adverse effects in cancer patients: a systematic review. *Clin Drug Investig*. 2007;27:381-  
14 396.

15 22. Tikhonova IA, Huxley N, Snowsill T, et al. Economic Analysis of First-Line Treatment with  
16 Cetuximab or Panitumumab for RAS Wild-Type Metastatic Colorectal Cancer in England.  
17 *Pharmacoeconomics*. 2018.

18 23. Hoyle M, Green C, Thompson-Coon J, et al. Cost-effectiveness of temsirolimus for first line  
19 treatment of advanced renal cell carcinoma. *Value Health*. 2010;13:61-68.

20 24. Amdahl J, Diaz J, Sharma A, Park J, Chandiwana D, Delea TE. Cost-effectiveness of pazopanib  
21 versus sunitinib for metastatic renal cell carcinoma in the United Kingdom. *Plos One*. 2017;12:e175920.

22 25. Edwards SJ, Wakefield V, Cain P, et al. Axitinib, cabozantinib, everolimus, nivolumab, sunitinib  
23 and best supportive care in previously treated renal cell carcinoma: a systematic review and economic  
24 evaluation. *Health Technol Assess*. 2018;22:1-278.

25 26. Wu B, Dong B, Xu Y, et al. Economic evaluation of first-line treatments for metastatic renal cell  
26 carcinoma: a cost-effectiveness analysis in a health resource-limited setting. *Plos One*. 2012;7:e32530.

27 27. Brahmer JR, Lacchetti C, Schneider BJ, et al. Management of Immune-Related Adverse Events in  
28 Patients Treated With Immune Checkpoint Inhibitor Therapy: American Society of Clinical Oncology  
29 Clinical Practice Guideline. *J Clin Oncol*. 2018;O2017776385.

30 28. Isobe T, Hayashi M, Tsubata Y. Clinical practice guidelines for the adverse events in medical  
31 oncology. *Nihon Rinsho*. 2015;73 Suppl 2:45-50.

32 29. Mickisch G, Gore M, Escudier B, Procopio G, Walzer S, Nuijten M. Costs of managing adverse  
33 events in the treatment of first-line metastatic renal cell carcinoma: bevacizumab in combination with  
34 interferon-alpha2a compared with sunitinib. *Br J Cancer*. 2010;102:80-86.

35 30. Jia Q. Cost-effectiveness of durogesic, morphine sulphate controlled-release tablets and oxycontin  
36 for advanced cancerous pain. *Chinese Journal of Clinical Rational Drug Use*. 2016;9:63-64.

37 31. Yu-mei T, Fang-zhan G, Hong-wu Z, Ru-yi Y, Lan-qing Y, Ping L. The effectiveness of Chinese  
38 herbal fumigation for hand-foot syndrome caused by capecitabine. *Qinghai Medical Journal*. 2017:68-  
39 70.

40 32. Amdahl J, Diaz J, Park J, Nakhaipour HR, Delea TE. Cost-effectiveness of pazopanib compared  
41 with sunitinib in metastatic renal cell carcinoma in Canada. *Curr Oncol*. 2016;23:e340-e354.

42 33. de Groot S, Redekop WK, Versteegh MM, et al. Health-related quality of life and its determinants  
43 in patients with metastatic renal cell carcinoma. *Qual Life Res*. 2018;27:115-124.

44 34. Briggs AH, Weinstein MC, Fenwick EAL, et al. Model parameter estimation and uncertainty



1 analysis: a report of the ISPOR-SMDM Modeling Good Research Practices Task Force Working Group-  
2 6. Medical Decision Making: An International Journal of the Society for Medical Decision Making.  
3 2012;32:722-732.

4 35. Palla AR, Smith E, Doll D. Bullous pemphigoid associated with the 480-mg nivolumab dose in a  
5 patient with metastatic renal cell carcinoma. Immunotherapy-Uk. 2019;11:1187-1192.

6 36. Xiao J, Sun JF, Wang QQ, Qi X, Yao HY. Health economic evaluation reporting guideline and  
7 application status. Zhonghua Yu Fang Yi Xue Za Zhi. 2017;51:276-280.

8 37. Bullement A, Nathan P, Willis A, et al. Cost Effectiveness of Avelumab for Metastatic Merkel Cell  
9 Carcinoma. Pharmacocon Open. 2019.

10 38. Hu X, Hay JW. First-line pembrolizumab in PD-L1 positive non-small-cell lung cancer: A cost-  
11 effectiveness analysis from the UK health care perspective. Lung Cancer. 2018;123:166-171.

12 39. Atezolizumab for treating locally advanced or metastatic urothelial carcinoma.  
13 <https://www.nice.org.uk/guidance/ta492/documents/appraisal-consultation-document>. [Accessed 5  
14 April 2019].

15 40. Hinde S, Epstein D, Cook A, Embleton A, Perren T, Sculpher M. The Cost-Effectiveness of  
16 Bevacizumab in Advanced Ovarian Cancer Using Evidence from the ICON7 Trial. Value Health.  
17 2016;19:431-439.

18 41. Hai-tao C, Jun-qi W, Yong-xing S, Baron A. Survey of the Advanced Cancer Patients' Medical  
19 Costs in Registered Hospice Care Agencies in Five Provinces and Municipalities. Chinese General  
20 Practice. 2010;13:3544-3546.

21  
22  
23  
24  
25  
26  
27  
28  
29  
30  
31  
32  
33  
34  
35  
36  
37  
38  
39  
40  
41  
42  
43  
44

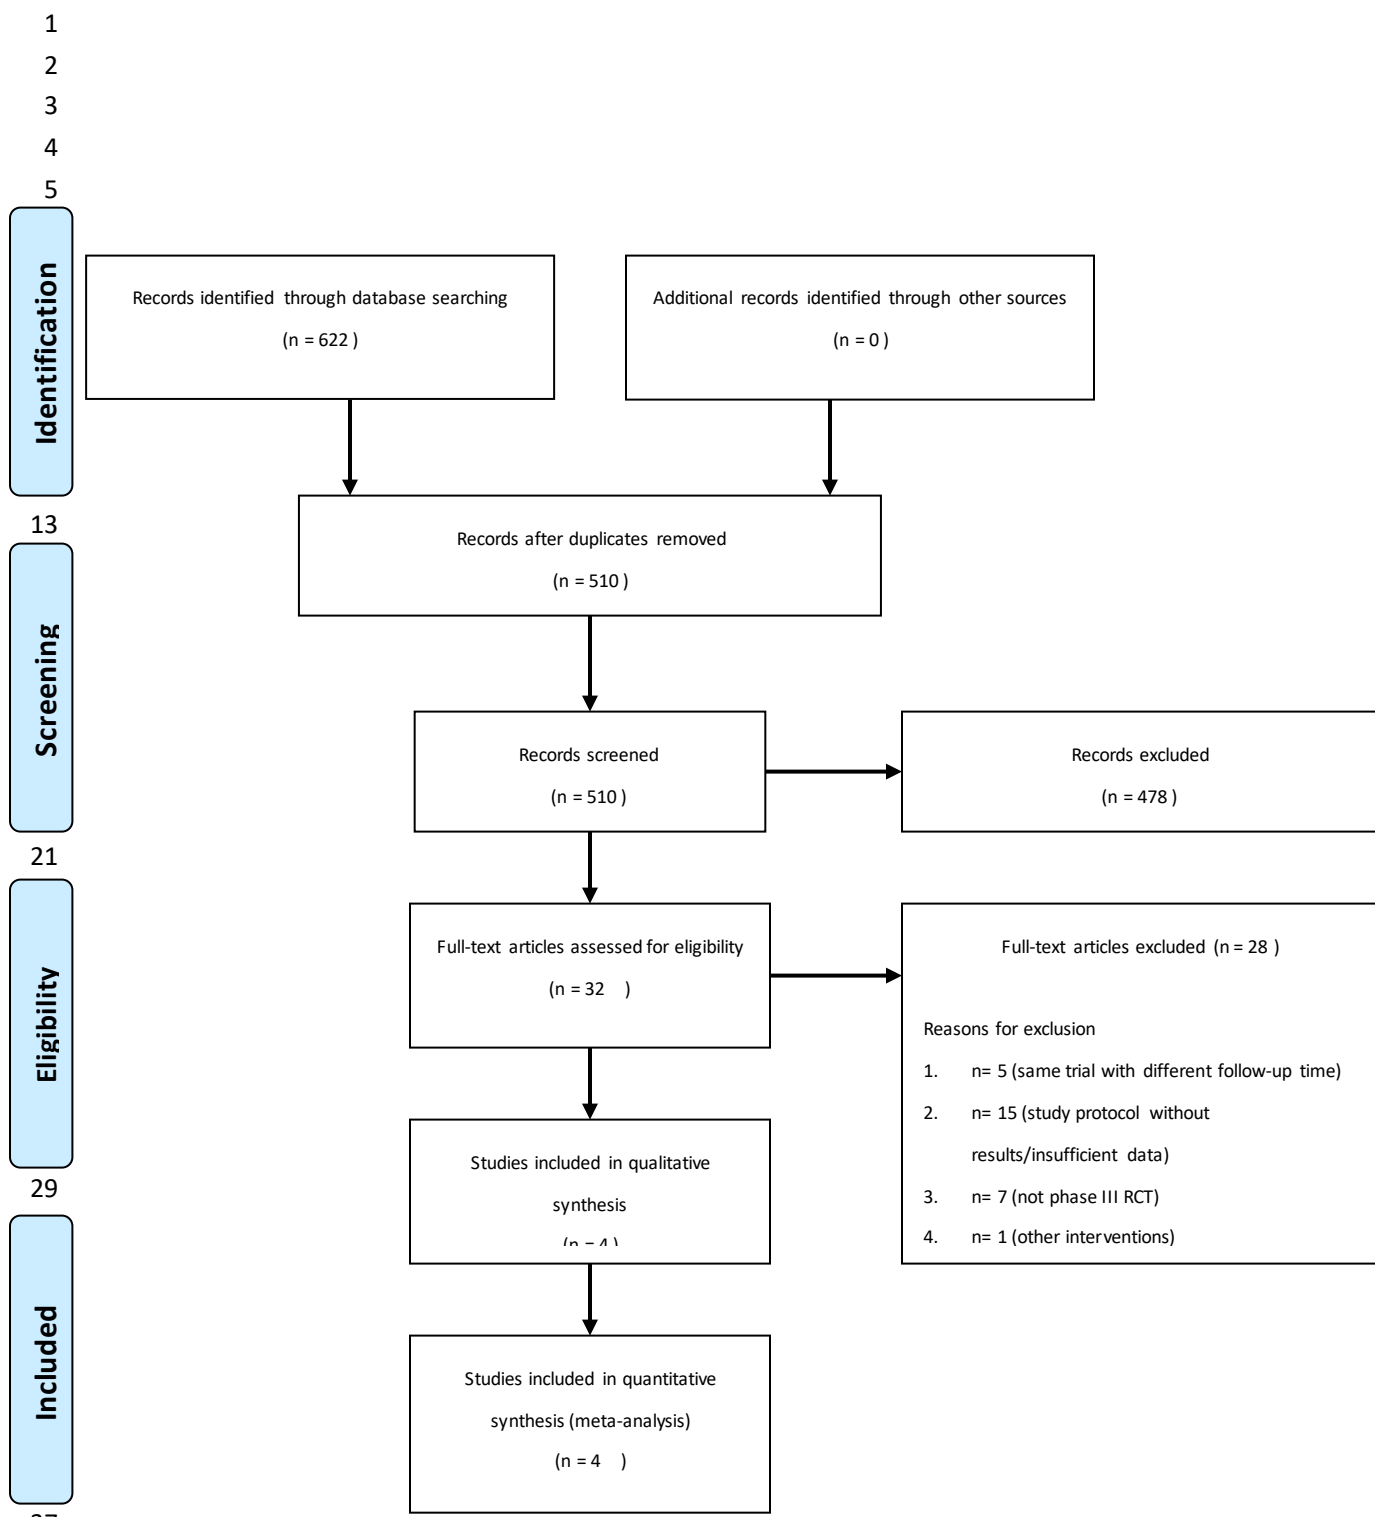

Appendix Figure 1: Flow chart of evidence acquisition.

1  
2  
3  
4  
5  
6  
7

|                   | Random sequence generation (selection bias) | Allocation concealment (selection bias) | Blinding of participants and personnel (performance bias) | Blinding of outcome assessment (detection bias) | Incomplete outcome data (attrition bias) | Selective reporting (reporting bias) | Other bias |
|-------------------|---------------------------------------------|-----------------------------------------|-----------------------------------------------------------|-------------------------------------------------|------------------------------------------|--------------------------------------|------------|
| CheckMate 214     | ?                                           | ?                                       | ●                                                         | ●                                               | ●                                        | ●                                    | ?          |
| Immotion 151      | ?                                           | ?                                       | ●                                                         | ?                                               | ●                                        | ●                                    | ?          |
| JAVELIN Renal 101 | ?                                           | ?                                       | ●                                                         | ●                                               | ●                                        | ●                                    | ?          |
| KEYNOTE-426       | ?                                           | ?                                       | ●                                                         | ●                                               | ●                                        | ●                                    | ?          |

8  
9  
10  
11  
12  
13  
14  
15  
16  
17  
18  
19  
20  
21  
22

Appendix Figure 2: Network plot of evidence of all trials.

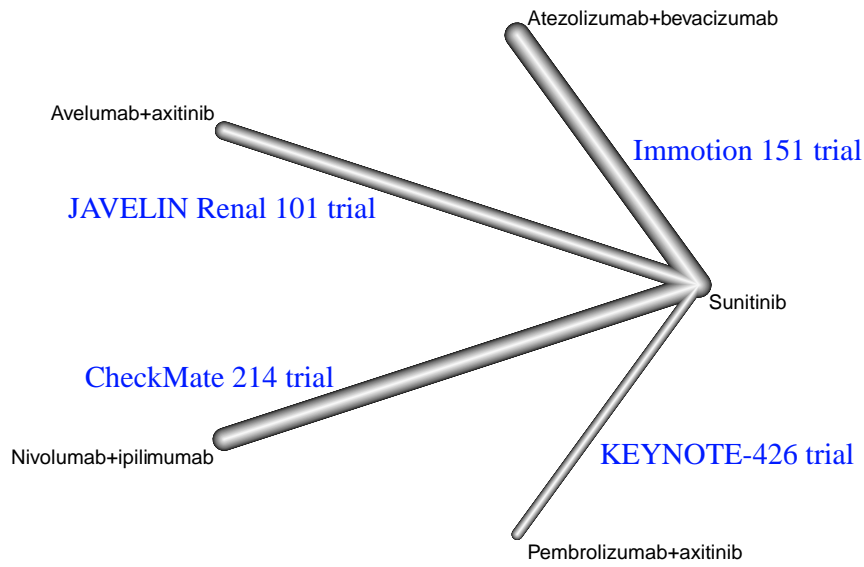

- 1
- 2
- 3
- 4
- 5
- 6
- 7
- 8
- 9
- 10
- 11
- 12
- 13
- 14
- 15
- 16
- 17
- 18
- 19
- 20
- 21
- 22

Appendix Figure 3: Network plot of evidence of all trials.

A.

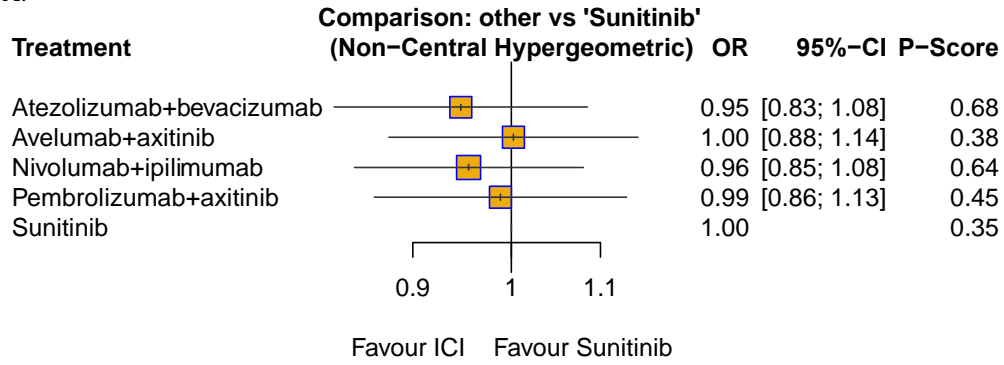

B.

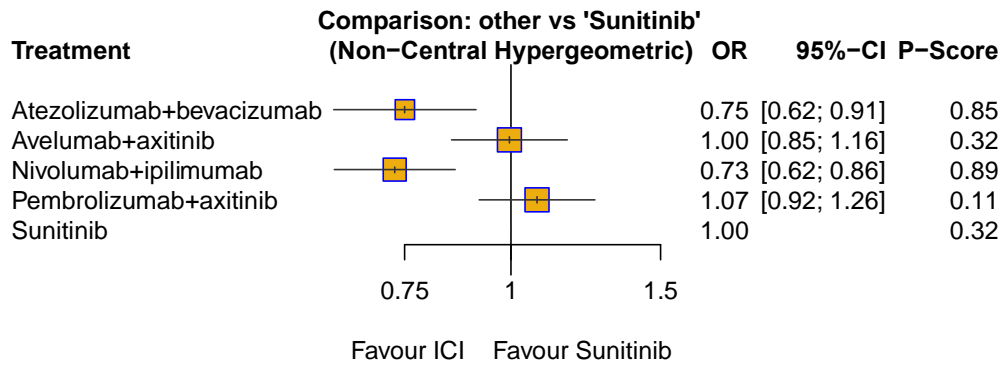

1

2 Appendix Figure 4: The forest plots of any ADRs (A) and ADRs (B) grade $\geq$ 3 in the comparisons of  
3 four ICI regimens versus sunitinib treatment.

4

5

6

7

8

9

10

11

12

13

14

15

16

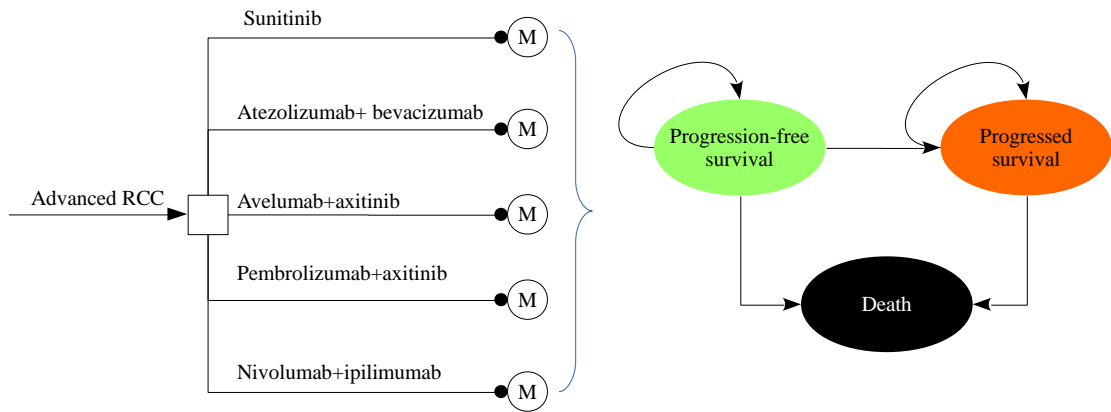

1  
2  
3  
4  
5  
6  
7  
8  
9  
10  
11  
12  
13  
14  
15  
16  
17  
18  
19  
20  
21  
22  
23  
24

Appendix Figure 5: Model structure for cost-effectiveness analysis.

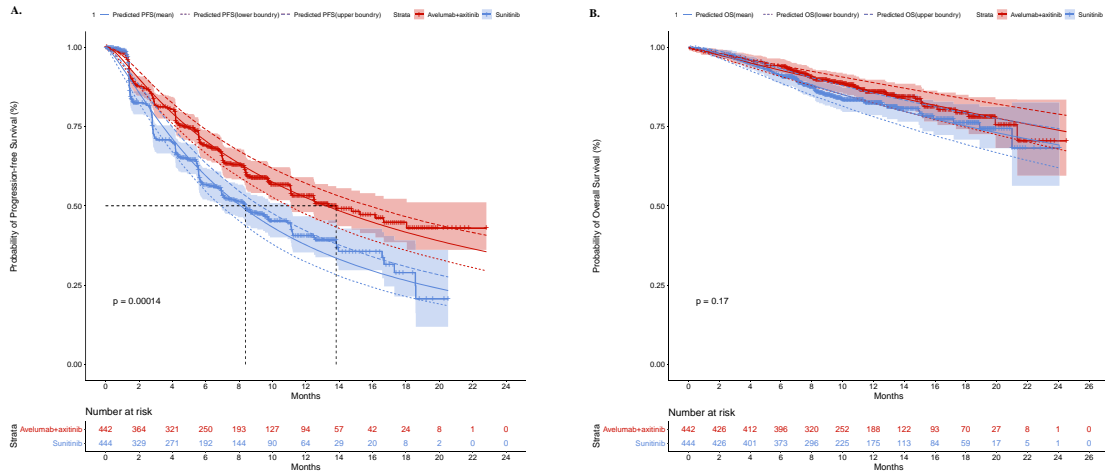

1  
2  
3  
4  
5  
6  
7  
8

Appendix Figure 6: The replicated Kaplan–Meier PFS (A) and OS (B) curves of Avelumab+axitinib (red) and Sunitinib treatments (blue) in JAVELIN Renal 101 trial. The smooth lines indicated the survival curves predicting their corresponding best survival distributions (The distribution information showed in appendix Table 5). The smoothly solid, dashed and dotted lines indicated the mean, upper boundary and lower boundary lines of 95% CI.

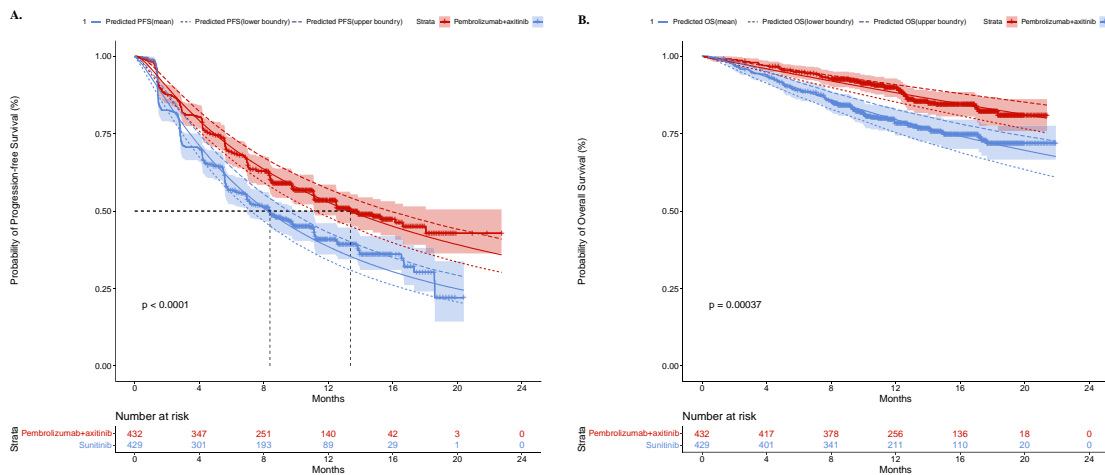

9  
10  
11  
12  
13  
14  
15

Appendix Figure 7: The replicated Kaplan–Meier PFS (A) and OS (B) curves of Pembrolizumab+axitinib (red) and Sunitinib treatments (blue) in KEYNOTE-426 trial. The smooth lines indicated the survival curves predicting their corresponding best survival distributions (The distribution information showed in appendix Table 5). The smoothly solid, dashed and dotted lines indicated the mean, upper boundary and lower boundary lines of 95% CI.

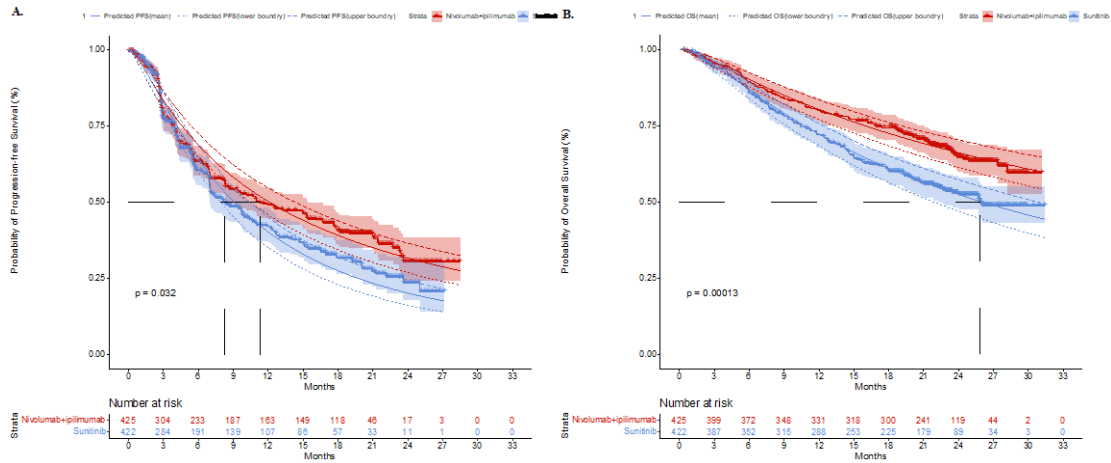

1  
2  
3  
4  
5  
6  
7

Appendix Figure 8: The replicated Kaplan–Meier PFS (A) and OS (B) curves of Nivolumab+ipilimumab (red) and Sunitinib treatments (blue) in CheckMate 214 trial. The smooth lines indicated the survival curves predicting their corresponding best survival distributions (The distribution information showed in appendix Table 5). The smoothly solid, dashed and dotted lines indicated the mean, upper boundary and lower boundary lines of 95% CI.

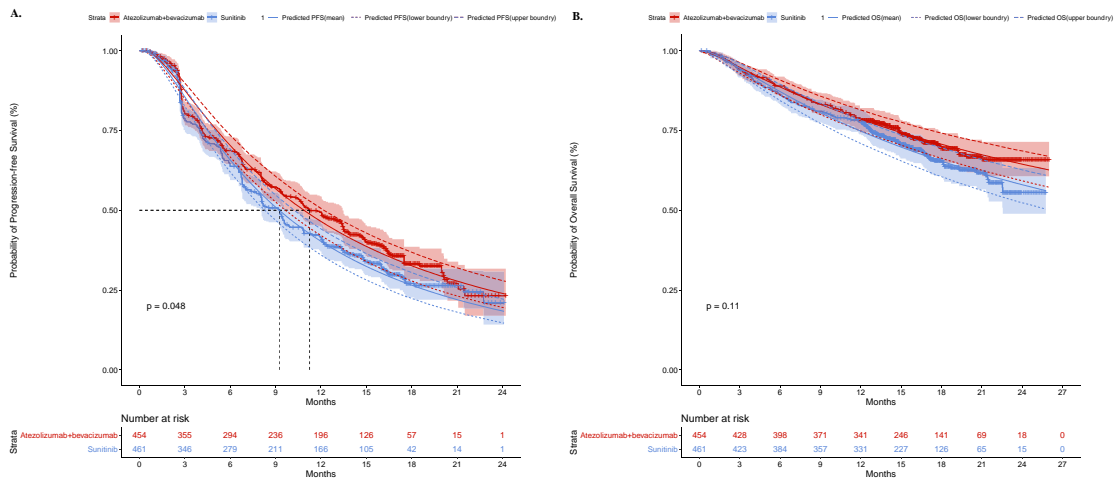

8  
9  
10  
11  
12  
13  
14  
15  
16  
17  
18  
19  
20  
21  
22

Appendix Figure 9: The replicated Kaplan–Meier PFS (A) and OS (B) curves of Atezolizumab+bevacizumab (red) and Sunitinib treatments (blue) in IMmotion151 trial. The smooth lines indicated the survival curves predicting their corresponding best survival distributions (The distribution information showed in appendix Table 5). The smoothly solid, dashed and dotted lines indicated the mean, upper boundary and lower boundary lines of 95% CI.



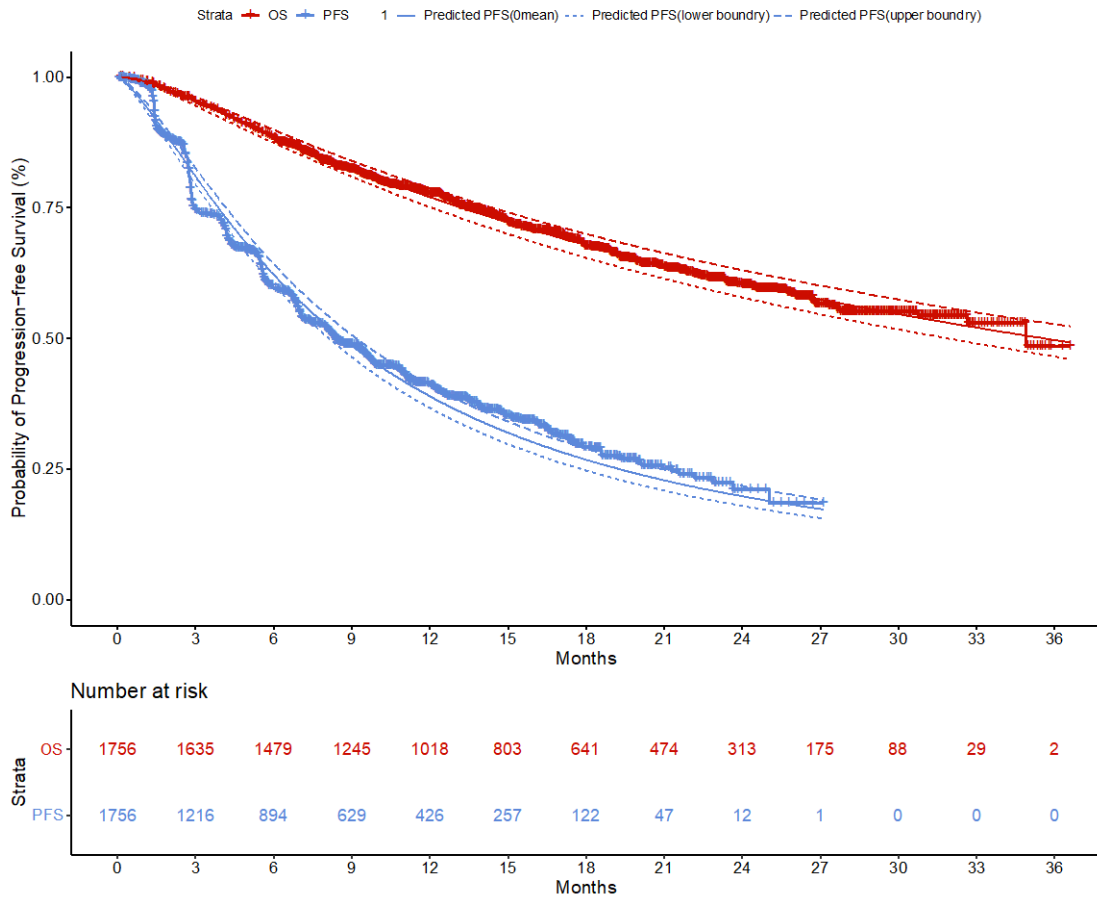

1  
2  
3  
4  
5  
6  
7  
8  
9  
10

Appendix Figure 10: The replicated Kaplan–Meier PFS (blue) and OS (red) curves of sunitinib treatment by pooling the CheckMate 214, KEYNOTE-426, IMmotion 151 and JAVELIN Renal 101 trials. The smooth lines indicated the survival curves predicting their corresponding best survival distributions (The distribution information showed in appendix Table 5). The smoothly solid, dashed and dotted lines indicated the mean, upper boundary and lower boundary lines of 95% CI.

A. PFS in JAVELIN Renal 101 trial

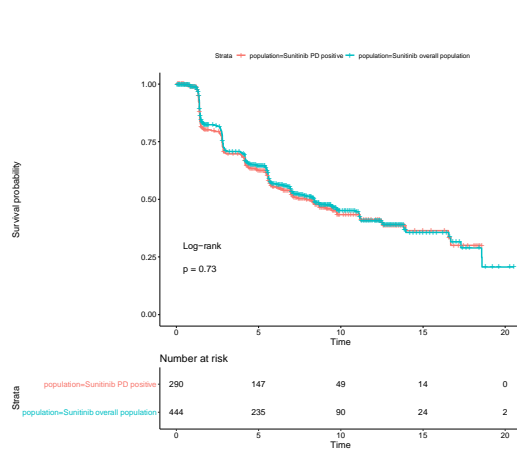

B. PFS in IMmotion151 trial

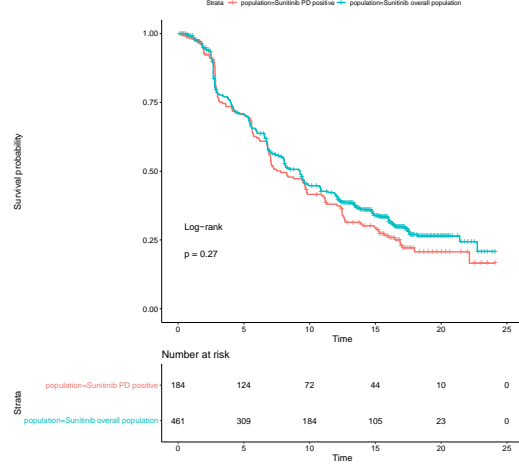

C. PFS in PD-L1-positive tumors from JAVELIN Renal 101 and IMmotion151 trials versus overall population in 4 trials

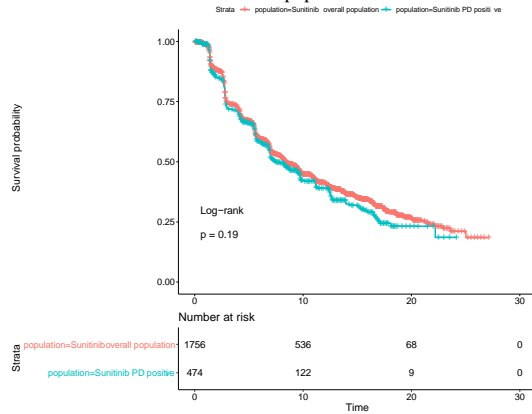

D. OS in CheckMate 214 trial

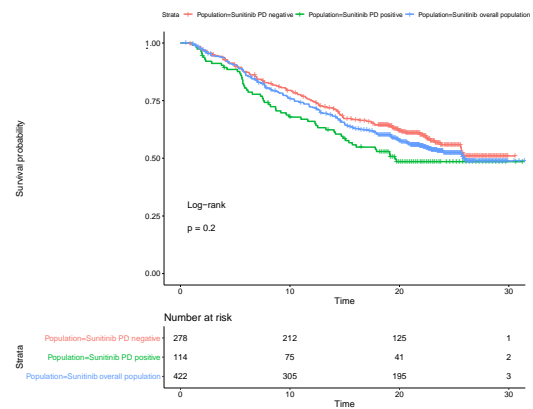

1

2 Appendix Figure 11: The replicated PFS of sunitinib treatment in PD-L1-positive tumors versus  
 3 overall population form the JAVELIN Renal 101 (A), IMmotion 151 trials (B) and the pooled PFS  
 4 data in PD-L1-positive tumors from JAVELIN Renal 101 and IMmotion 151 trials versus pooled  
 5 PFS data in overall population from the CheckMate 214, KEYNOTE-426, IMmotion 151 and  
 6 JAVELIN Renal 101 trials (C). The replicated OS of sunitinib treatment in PD-L1-positive and  
 7 negative tumors versus overall population form the CheckMate 214 (D).

8

9

**A. Avelumab plus axitinib**

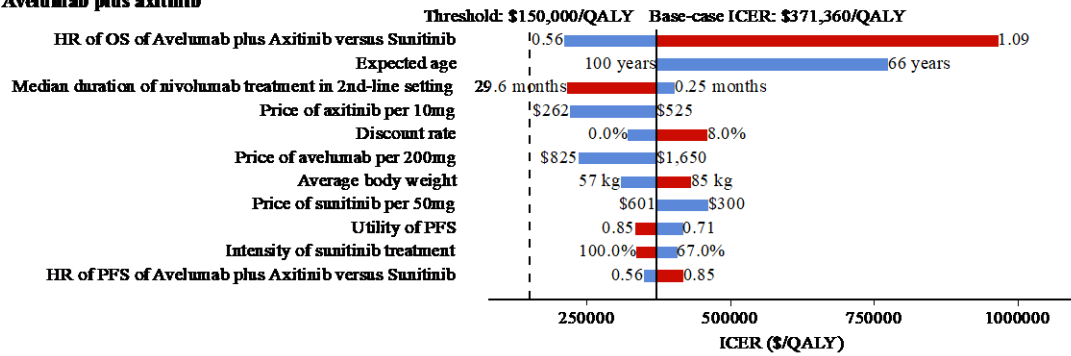

**B. Pembrolizumab plus axitinib**

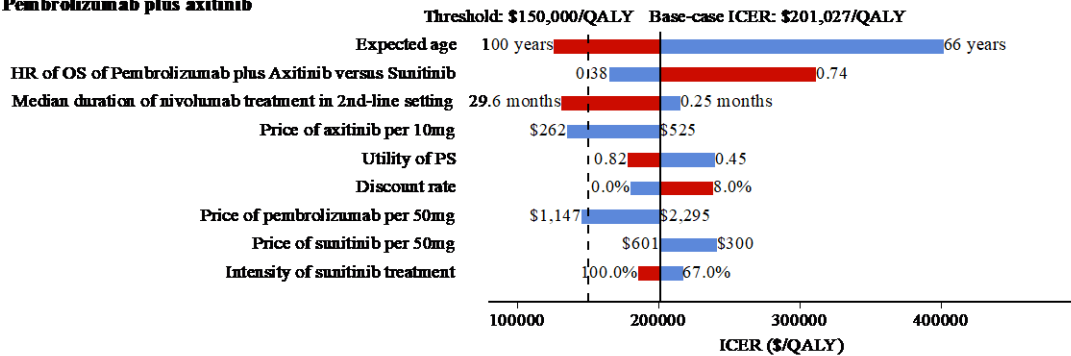

**C. Nivolumab plus ipilimumab**

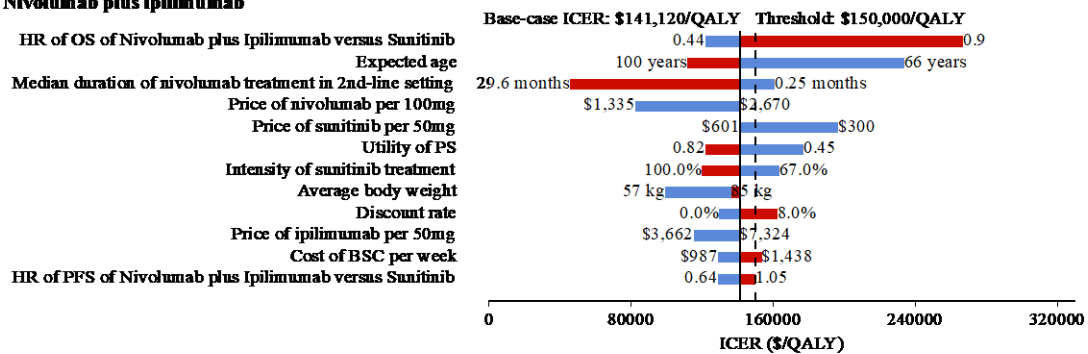

**D. Atezolizumab plus bevacizumab**

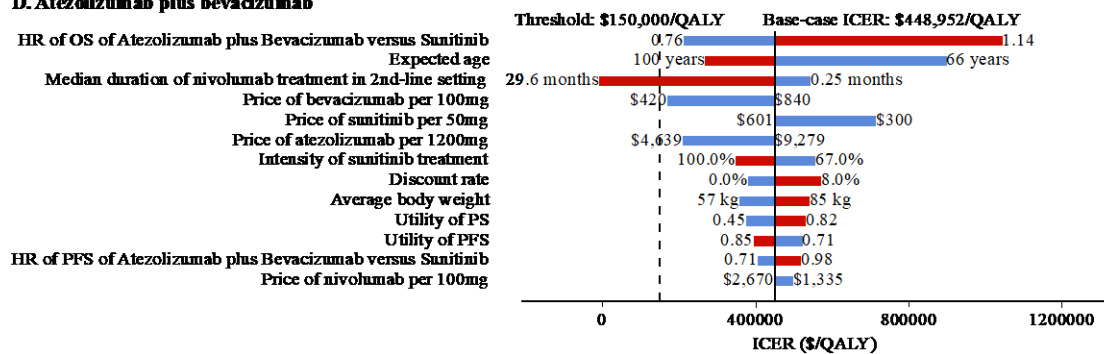

- 1
- 2
- 3
- 4
- 5
- 6
- 7
- 8
- 9

Appendix Figure 12: One-way sensitivity analyses of avelumab plus axitinib (A), pembrolizumab plus axitinib (B), nivolumab plus ipilimumab (C) and atezolizumab plus bevacizumab (D) in comparison with sunitinib.

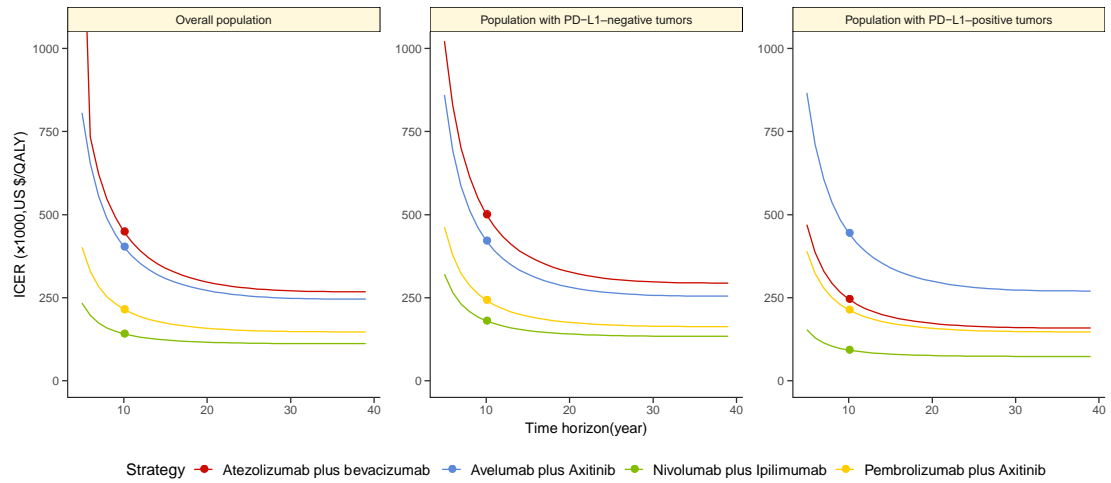

1  
2  
3  
4  
5  
6  
7  
8  
9  
10  
11  
12  
13  
14  
15  
16  
17  
18  
19  
20  
21  
22  
23  
24  
25  
26  
27  
28  
29

Appendix Figure 13: The impact of time horizon on ICERs. The points indicated the baseline time horizon (10 years) in overall population, PD-L1-positive and negative tumors.

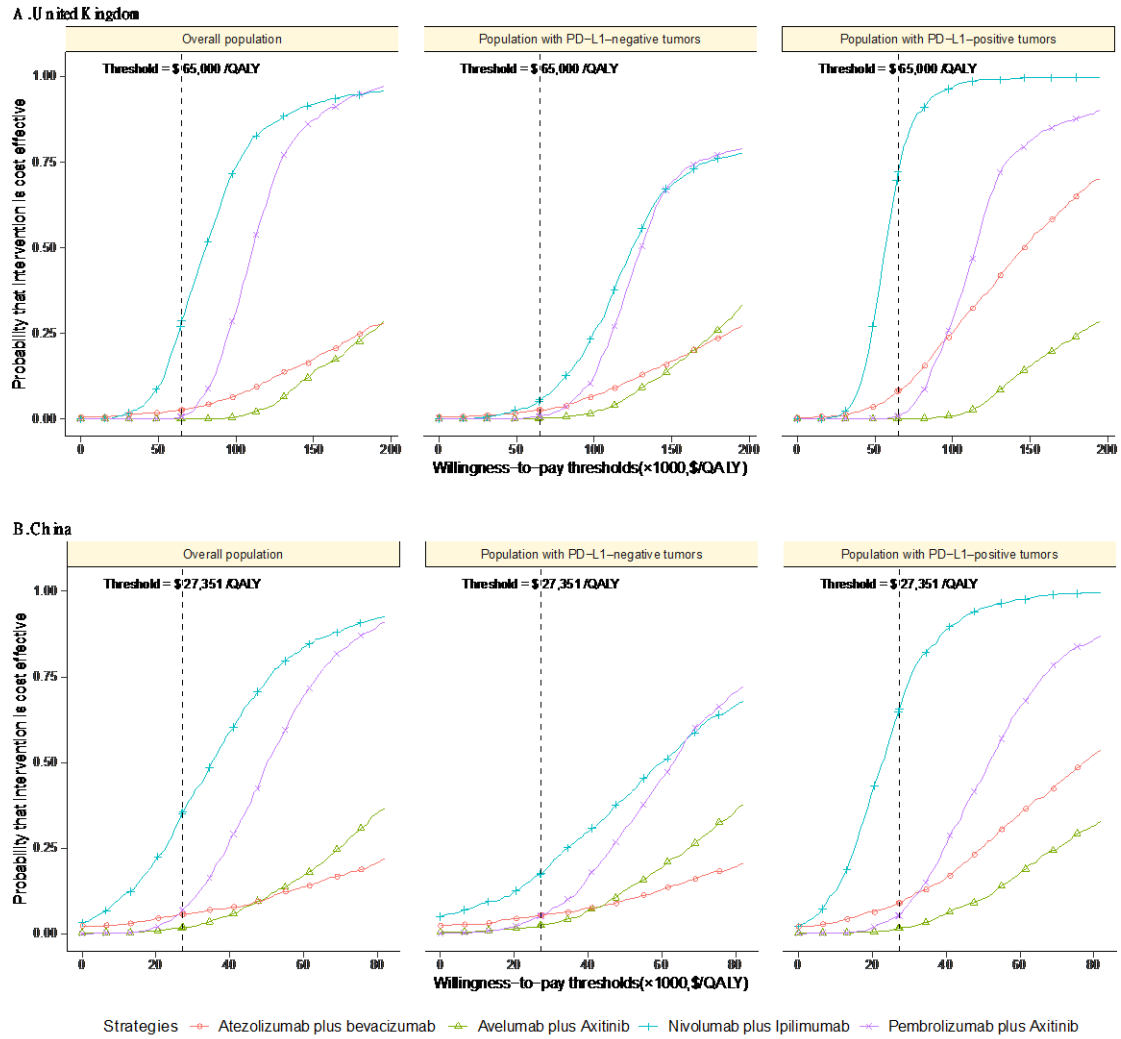

1  
2  
3  
4  
5  
6  
7  
8  
9  
10  
11  
12  
13  
14  
15  
16  
17  
18  
19

Appendix Figure 14: The cost-effectiveness acceptability curves for avelumab plus axitinib, pembrolizumab plus axitinib, nivolumab plus ipilimumab and atezolizumab plus bevacizumab strategies compared to the sunitinib strategy in overall population, PD-L1-positive and negative tumors in UK (panel A) and China (panel B).

1  
2  
3  
4

**Appendix Table 1: PRISMA NMA Checklist of Items to Include When Reporting A Systematic Review Involving a Network Meta-analysis**

| Section/Topic             | Item # | Checklist Item                                                                                                                                                                                                                                                                                                                                                                                                                                                                                                                                                                                                                                                                                                                                                                          | Reported on Page #      |
|---------------------------|--------|-----------------------------------------------------------------------------------------------------------------------------------------------------------------------------------------------------------------------------------------------------------------------------------------------------------------------------------------------------------------------------------------------------------------------------------------------------------------------------------------------------------------------------------------------------------------------------------------------------------------------------------------------------------------------------------------------------------------------------------------------------------------------------------------|-------------------------|
| <b>TITLE</b>              |        |                                                                                                                                                                                                                                                                                                                                                                                                                                                                                                                                                                                                                                                                                                                                                                                         |                         |
| Title                     | 1      | Identify the report as a systematic review <i>incorporating a network meta-analysis (or related form of meta-analysis)</i> .                                                                                                                                                                                                                                                                                                                                                                                                                                                                                                                                                                                                                                                            | 1                       |
| <b>ABSTRACT</b>           |        |                                                                                                                                                                                                                                                                                                                                                                                                                                                                                                                                                                                                                                                                                                                                                                                         |                         |
| Structured summary        | 2      | Provide a structured summary including, as applicable:<br><b>Background:</b> main objectives<br><b>Methods:</b> data sources; study eligibility criteria, participants, and interventions; study appraisal; and <i>synthesis methods, such as network meta-analysis</i> .<br><b>Results:</b> number of studies and participants identified; summary estimates with corresponding confidence/credible intervals; <i>treatment rankings may also be discussed. Authors may choose to summarize pairwise comparisons against a chosen treatment included in their analyses for brevity.</i><br><b>Discussion/Conclusions:</b> limitations; conclusions and implications of findings.<br><b>Other:</b> primary source of funding; systematic review registration number with registry name. | 2                       |
| <b>INTRODUCTION</b>       |        |                                                                                                                                                                                                                                                                                                                                                                                                                                                                                                                                                                                                                                                                                                                                                                                         |                         |
| Rationale                 | 3      | Describe the rationale for the review in the context of what is already known, <i>including mention of why a network meta-analysis has been conducted.</i>                                                                                                                                                                                                                                                                                                                                                                                                                                                                                                                                                                                                                              | 3                       |
| Objectives                | 4      | Provide an explicit statement of questions being addressed, with reference to participants, interventions, comparisons, outcomes, and study design (PICOS).                                                                                                                                                                                                                                                                                                                                                                                                                                                                                                                                                                                                                             | 3                       |
| <b>METHODS</b>            |        |                                                                                                                                                                                                                                                                                                                                                                                                                                                                                                                                                                                                                                                                                                                                                                                         |                         |
| Protocol and registration | 5      | Indicate whether a review protocol exists and if and where it can be accessed (e.g., Web address); and, if available, provide registration information, including registration number.                                                                                                                                                                                                                                                                                                                                                                                                                                                                                                                                                                                                  | Not applicable          |
| Eligibility criteria      | 6      | Specify study characteristics (e.g., PICOS, length of follow-up) and report characteristics (e.g., years considered, language, publication status) used as criteria for eligibility, giving rationale. <i>Clearly describe eligible treatments included in the treatment network, and note whether any have been clustered or merged into the same node</i>                                                                                                                                                                                                                                                                                                                                                                                                                             | <i>Appendix table 3</i> |

| <i>(with justification)._</i>          |           |                                                                                                                                                                                                                                                                                                                                                                                                                        |                |
|----------------------------------------|-----------|------------------------------------------------------------------------------------------------------------------------------------------------------------------------------------------------------------------------------------------------------------------------------------------------------------------------------------------------------------------------------------------------------------------------|----------------|
| Information sources                    | 7         | Describe all information sources (e.g., databases with dates of coverage, contact with study authors to identify additional studies) in the search and date last searched.                                                                                                                                                                                                                                             | 3              |
| Search                                 | 8         | Present full electronic search strategy for at least one database, including any limits used, such that it could be repeated.                                                                                                                                                                                                                                                                                          | 3              |
| Study selection                        | 9         | State the process for selecting studies (i.e., screening, eligibility, included in systematic review, and, if applicable, included in the meta-analysis).                                                                                                                                                                                                                                                              | 3              |
| Data collection process                | 10        | Describe method of data extraction from reports (e.g., piloted forms, independently, in duplicate) and any processes for obtaining and confirming data from investigators.                                                                                                                                                                                                                                             | 4              |
| Data items                             | 11        | List and define all variables for which data were sought (e.g., PICOS, funding sources) and any assumptions and simplifications made.                                                                                                                                                                                                                                                                                  | 4              |
| <b>Geometry of the network</b>         | <b>S1</b> | Describe methods used to explore the geometry of the treatment network under study and potential biases related to it. This should include how the evidence base has been graphically summarized for presentation, and what characteristics were compiled and used to describe the evidence base to readers.                                                                                                           | <b>4</b>       |
| Risk of bias within individual studies | 12        | Describe methods used for assessing risk of bias of individual studies (including specification of whether this was done at the study or outcome level), and how this information is to be used in any data synthesis.                                                                                                                                                                                                 | 4              |
| Summary measures                       | 13        | State the principal summary measures (e.g., risk ratio, difference in means). <i>Also describe the use of additional summary measures assessed, such as treatment rankings and surface under the cumulative ranking curve (SUCRA) values, as well as modified approaches used to present summary findings from meta-analyses.</i>                                                                                      | 4              |
| Planned methods of analysis            | 14        | Describe the methods of handling data and combining results of studies for each network meta-analysis. This should include, but not be limited to: <ul style="list-style-type: none"> <li>• <i>Handling of multi-arm trials;</i></li> <li>• <i>Selection of variance structure;</i></li> <li>• <i>Selection of prior distributions in Bayesian analyses; and</i></li> <li>• <i>Assessment of model fit.</i></li> </ul> | 4              |
| <b>Assessment of Inconsistency</b>     | <b>S2</b> | Describe the statistical methods used to evaluate the agreement of direct and indirect evidence in the treatment network(s) studied. Describe efforts taken to address its presence when found.                                                                                                                                                                                                                        | 4              |
| Risk of bias across studies            | 15        | Specify any assessment of risk of bias that may affect the cumulative evidence (e.g., publication bias, selective reporting within studies).                                                                                                                                                                                                                                                                           | Not applicable |
| Additional analyses                    | 16        | Describe methods of additional analyses if done, indicating which were pre-specified. This may include, but not be limited to, the following:                                                                                                                                                                                                                                                                          | 4              |

- Sensitivity or subgroup analyses;
- Meta-regression analyses;
- *Alternative formulations of the treatment network; and*
- *Use of alternative prior distributions for Bayesian analyses (if applicable).*\_

## RESULTS†

|                                          |           |                                                                                                                                                                                                                                                                                                                                                                                                                                                              |                          |
|------------------------------------------|-----------|--------------------------------------------------------------------------------------------------------------------------------------------------------------------------------------------------------------------------------------------------------------------------------------------------------------------------------------------------------------------------------------------------------------------------------------------------------------|--------------------------|
| Study selection                          | 17        | Give numbers of studies screened, assessed for eligibility, and included in the review, with reasons for exclusions at each stage, ideally with a flow diagram.                                                                                                                                                                                                                                                                                              | Appendix Figure 1        |
| <b>Presentation of network structure</b> | <b>S3</b> | Provide a network graph of the included studies to enable visualization of the geometry of the treatment network.                                                                                                                                                                                                                                                                                                                                            | <b>Appendix Figure 3</b> |
| <b>Summary of network geometry</b>       | <b>S4</b> | Provide a brief overview of characteristics of the treatment network. This may include commentary on the abundance of trials and randomized patients for the different interventions and pairwise comparisons in the network, gaps of evidence in the treatment network, and potential biases reflected by the network structure.                                                                                                                            | Not applicable           |
| Study characteristics                    | 18        | For each study, present characteristics for which data were extracted (e.g., study size, PICOS, follow-up period) and provide the citations.                                                                                                                                                                                                                                                                                                                 | Appendix Table 4         |
| Risk of bias within studies              | 19        | Present data on risk of bias of each study and, if available, any outcome level assessment.                                                                                                                                                                                                                                                                                                                                                                  | Appendix Figure 2        |
| Results of individual studies            | 20        | For all outcomes considered (benefits or harms), present, for each study: 1) simple summary data for each intervention group, and 2) effect estimates and confidence intervals. <i>Modified approaches may be needed to deal with information from larger networks.</i>                                                                                                                                                                                      | 5                        |
| Synthesis of results                     | 21        | Present results of each meta-analysis done, including confidence/credible intervals. <i>In larger networks, authors may focus on comparisons versus a particular comparator (e.g. placebo or standard care), with full findings presented in an appendix. League tables and forest plots may be considered to summarize pairwise comparisons.</i> If additional summary measures were explored (such as treatment rankings), these should also be presented. | Figure 1 and 2           |
| <b>Exploration for inconsistency</b>     | <b>S5</b> | Describe results from investigations of inconsistency. This may include such information as measures of model fit to compare consistency and inconsistency models, <i>P</i> values from statistical tests, or summary of inconsistency estimates from different parts of the treatment network.                                                                                                                                                              | Not applicable           |
| Risk of bias across studies              | 22        | Present results of any assessment of risk of bias across studies for the evidence base being studied.                                                                                                                                                                                                                                                                                                                                                        | Not applicable           |



|                                |    |                                                                                                                                                                                                                                                                                                                                                                                                                                |                |
|--------------------------------|----|--------------------------------------------------------------------------------------------------------------------------------------------------------------------------------------------------------------------------------------------------------------------------------------------------------------------------------------------------------------------------------------------------------------------------------|----------------|
| Results of additional analyses | 23 | Give results of additional analyses, if done (e.g., sensitivity or subgroup analyses, meta-regression analyses, <i>alternative network geometries studied, alternative choice of prior distributions for Bayesian analyses</i> , and so forth).                                                                                                                                                                                | Figure 1 and 2 |
| <b>DISCUSSION</b>              |    |                                                                                                                                                                                                                                                                                                                                                                                                                                |                |
| Summary of evidence            | 24 | Summarize the main findings, including the strength of evidence for each main outcome; consider their relevance to key groups (e.g., healthcare providers, users, and policy-makers).                                                                                                                                                                                                                                          | 6              |
| Limitations                    | 25 | Discuss limitations at study and outcome level (e.g., risk of bias), and at review level (e.g., incomplete retrieval of identified research, reporting bias). <i>Comment on the validity of the assumptions, such as transitivity and consistency. Comment on any concerns regarding network geometry (e.g., avoidance of certain comparisons).</i>                                                                            | 7              |
| Conclusions                    | 26 | Provide a general interpretation of the results in the context of other evidence, and implications for future research.                                                                                                                                                                                                                                                                                                        | 7              |
| <b>FUNDING</b>                 |    |                                                                                                                                                                                                                                                                                                                                                                                                                                |                |
| Funding                        | 27 | Describe sources of funding for the systematic review and other support (e.g., supply of data); role of funders for the systematic review. This should also include information regarding whether funding has been received from manufacturers of treatments in the network and/or whether some of the authors are content experts with professional conflicts of interest that could affect use of treatments in the network. | 7              |

1  
2  
3  
4  
5  
6  
7  
8  
9  
10  
11  
12  
13  
14  
15  
16  
17  
18  
19

PICOS = population, intervention, comparators, outcomes, study design.

\* Text in italics indicates wording specific to reporting of network meta-analyses that has been added to guidance from the PRISMA statement.

† Authors may wish to plan for use of appendices to present all relevant information in full detail for items in this section.

1  
2  
3  
4  
5  
6  
7  
8  
9

**Appendix table 2: CHEERS Checklist**

**Items to include when reporting economic evaluations of health interventions**

The **ISPOR CHEERS Task Force Report**, *Consolidated Health Economic Evaluation Reporting Standards (CHEERS)—Explanation and Elaboration: A Report of the ISPOR Health Economic Evaluations Publication Guidelines Good Reporting Practices TaskForce*, provides examples and further discussion of the 24-item CHEERS Checklist and the CHEERS Statement. It may be accessed via the *Value in Health* or via the ISPOR Health Economic Evaluation Publication Guidelines – CHEERS: Good Reporting Practices webpage: <http://www.ispor.org/TaskForces/EconomicPubGuidelines.asp>

| <b>Section</b>                  | <b>Item No</b> | <b>Recommendation</b>                                                                                                                                                                   | <b>Reported on page No/line No</b> |
|---------------------------------|----------------|-----------------------------------------------------------------------------------------------------------------------------------------------------------------------------------------|------------------------------------|
| <b>Title and Abstract</b>       |                |                                                                                                                                                                                         |                                    |
| Title                           | 1              | Identify the study as an economic evaluation or use more specific terms such as “cost-effectiveness analysis”, and describe the interventions compared.                                 | 1/1-2                              |
| Abstract                        | 2              | Provide a structured summary of objectives, perspective, setting, methods (including study design and inputs), results (including base case and uncertainty analyses), and conclusions. | 2/1-33                             |
| <b>Introduction</b>             |                |                                                                                                                                                                                         |                                    |
| Background and objectives       | 3              | Provide an explicit statement of the broader context for the study.<br><br>Present the study question and its relevance for health policy or practice decisions.                        | 3/19-21                            |
| <b>Methods</b>                  |                |                                                                                                                                                                                         |                                    |
| Target population and subgroups | 4              | Describe characteristics of the base case population and subgroups analysed, including why they were chosen.                                                                            | Appendix file 2: 2/19-21           |
| Setting and location            | 5              | State relevant aspects of the system(s) in which the decision(s) need(s) to be made.                                                                                                    | 3/19-25                            |
| Study perspective               | 6              | Describe the perspective of the study and relate this to the costs being evaluated.                                                                                                     | Appendix file 2: 3/23              |
| Comparators                     | 7              | Describe the interventions or strategies being compared and state why they were chosen.                                                                                                 | Appendix file 2: 2/6-7             |
| Time horizon                    | 8              | State the time horizon(s) over which costs and consequences are being evaluated and say why                                                                                             | Appendix file 2: 2/12              |

|                                                        |     |                                                                                                                                                                                                                                                                                                                              |                                           |
|--------------------------------------------------------|-----|------------------------------------------------------------------------------------------------------------------------------------------------------------------------------------------------------------------------------------------------------------------------------------------------------------------------------|-------------------------------------------|
|                                                        |     | appropriate.                                                                                                                                                                                                                                                                                                                 |                                           |
| Discount rate                                          | 9   | Report the choice of discount rate(s) used for costs and outcomes and say why appropriate.                                                                                                                                                                                                                                   | Appendix file 2: 2/22                     |
| Choice of health outcomes                              | 10  | Describe what outcomes were used as the measure(s) of benefit in the evaluation and their relevance for the type of analysis performed.                                                                                                                                                                                      | Appendix file 2: 2/21-23                  |
| Measurement of effectiveness                           | 11a | <i>Single study-based estimates</i> : Describe fully the design features of the single effectiveness study and why the single study was a sufficient source of clinical effectiveness data.                                                                                                                                  | NA                                        |
|                                                        | 11b | <i>Synthesis-based estimates</i> : Describe fully the methods used for identification of included studies and synthesis of clinical effectiveness data.                                                                                                                                                                      | Appendix file 2: 2/29-36                  |
| Measurement and valuation of preference based outcomes | 12  | If applicable, describe the population and methods used to elicit preferences for outcomes.                                                                                                                                                                                                                                  | Appendix file 2: 4/2-9                    |
| Estimating resources and costs                         | 13a | <i>Single study-based economic evaluation</i> : Describe approaches used to estimate resource use associated with the alternative interventions. Describe primary or secondary research methods for valuing each resource item in terms of its unit cost. Describe any adjustments made to approximate to opportunity costs. | NA                                        |
|                                                        | 13b | <i>Model-based economic evaluation</i> : Describe approaches and data sources used to estimate resource use associated with model health states. Describe primary or secondary research methods for valuing each resource item in terms of its unit cost. Describe any adjustments made to approximate to opportunity costs. | Appendix file 2: 3/29-44                  |
| Currency, price date, and conversion                   | 14  | Report the dates of the estimated resource quantities and unit costs. Describe methods for adjusting estimated unit costs to the year of reported costs if necessary. Describe methods for converting costs into a common currency base and the exchange rate.                                                               | Appendix file 2: 3/26-27                  |
| Choice of model                                        | 15  | Describe and give reasons for the specific type of decision-analytical model used. Providing a figure to show model structure is strongly recommended.                                                                                                                                                                       | Appendix file 2: 2/5-8; appendix figure 5 |
| Assumptions                                            | 16  | Describe all structural or other assumptions underpinning                                                                                                                                                                                                                                                                    | Appendix                                  |

|                                |    |                                                                                                                                                                                                                                                                                                                                                       |                                    |
|--------------------------------|----|-------------------------------------------------------------------------------------------------------------------------------------------------------------------------------------------------------------------------------------------------------------------------------------------------------------------------------------------------------|------------------------------------|
|                                |    | the decision-analytical model.                                                                                                                                                                                                                                                                                                                        | file 2: 2/15-16; 3/8-9; 3/38; 4/17 |
| Analytical methods             | 17 | Describe all analytical methods supporting the evaluation. This could include methods for dealing with skewed, missing, or censored data; extrapolation methods; methods for pooling data; approaches to validate or make adjustments (such as half cycle corrections) to a model; and methods for handling population heterogeneity and uncertainty. | Appendix file 2: 4/11-41           |
| <b>Results</b>                 |    |                                                                                                                                                                                                                                                                                                                                                       |                                    |
| Study parameters               | 18 | Report the values, ranges, references, and, if used, probability distributions for all parameters. Report reasons or sources for distributions used to represent uncertainty where appropriate. Providing a table to show the input values is strongly recommended.                                                                                   | Appendix Table 5-6                 |
| Incremental costs and outcomes | 19 | For each intervention, report mean values for the main categories of estimated costs and outcomes of interest, as well as mean differences between the comparator groups. If applicable, report incremental cost-effectiveness ratios.                                                                                                                | Table 1                            |

1

|                                                    |     |                                                                                                                                                                                                                                                                             |                          |
|----------------------------------------------------|-----|-----------------------------------------------------------------------------------------------------------------------------------------------------------------------------------------------------------------------------------------------------------------------------|--------------------------|
| Characterizing uncertainty                         | 20a | <i>Single study-based economic evaluation:</i> Describe the effects of sampling uncertainty for the estimated incremental cost and incremental effectiveness parameters, together with the impact of methodological assumptions (such as discount rate, study perspective). | NA                       |
|                                                    | 20b | <i>Model-based economic evaluation:</i> Describe the effects on the results of uncertainty for all input parameters, and uncertainty related to the structure of the model and assumptions.                                                                                 | 7/21-30                  |
| Characterizing heterogeneity                       | 21  | If applicable, report differences in costs, outcomes, or cost-effectiveness that can be explained by variations between subgroups of patients with different baseline characteristics or other observed variability in effects that are not reducible by more information.  | 7/6-29                   |
| <b>Discussion</b>                                  |     |                                                                                                                                                                                                                                                                             |                          |
| Study findings, limitations, generalizability, and | 22  | Summarise key study findings and describe how they support the conclusions reached. Discuss limitations and the                                                                                                                                                             | 8/22-25; 9/40-42; 10/2-8 |

|                       |    |                                                                                                                                                                                                                                                   |          |
|-----------------------|----|---------------------------------------------------------------------------------------------------------------------------------------------------------------------------------------------------------------------------------------------------|----------|
| current knowledge     |    | generalisability of the findings and how the findings fit with current knowledge.                                                                                                                                                                 |          |
| <b>Other</b>          |    |                                                                                                                                                                                                                                                   |          |
| Source of funding     | 23 | Describe how the study was funded and the role of the funder in the identification, design, conduct, and reporting of the analysis. Describe other non-monetary sources of support.                                                               | 10/20-21 |
| Conflicts of interest | 24 | Describe any potential for conflict of interest of study contributors in accordance with journal policy. In the absence of a journal policy, we recommend authors comply with International Committee of Medical Journal Editors recommendations. | 10/20-21 |

1

2 For consistency, the CHEERS Statement checklist format is based on the format of the CONSORT  
3 statement checklist

4

5 The **ISPOR CHEERS Task Force Report** provides examples and further discussion of the 24-item  
6 CHEERS Checklist and the CHEERS Statement. It may be accessed via the *Value in Health* link or via the ISPOR  
7 Health Economic Evaluation Publication Guidelines – CHEERS: Good Reporting Practices  
8 webpage: <http://www.ispor.org/TaskForces/EconomicPubGuidelines.asp>

9

10 The citation for the CHEERS Task Force Report is:  
11 Husereau D, Drummond M, Petrou S, et al. Consolidated health economic evaluation reporting standards  
12 (CHEERS)—Explanation and elaboration: A report of the ISPOR health economic evaluations publication guidelines  
13 good reporting practices taskforce. *Value Health* 2013;16:231-50.

14

15

16

17

18

19

20

21

22

23

Appendix table 3: Summary of the review inclusion and exclusion criteria

| Clinical effectiveness | Inclusion Criteria                                                                                                                                                                                                 | Exclusion Criteria                                                       |
|------------------------|--------------------------------------------------------------------------------------------------------------------------------------------------------------------------------------------------------------------|--------------------------------------------------------------------------|
| Population             | Patients with previously treated advanced or metastatic renal cell carcinoma                                                                                                                                       | Patients <18 years of age<br><br>Healthy subjects<br><br>Animal studies  |
| Intervention           | The regimens containing the following ICIs in the first-line setting:<br><br>Pembrolizumab<br><br>Nivolumab<br><br>Atezolizumab<br><br>Durvalumab<br><br>Avelumab<br><br>Note: Combination therapies also possible | Interventions in the second- (and further-) line setting                 |
| Comparators            | Any, including placebo and best supportive care (BSC)                                                                                                                                                              | Radiotherapy, surgery and other non-pharmaceutical treatments            |
| Outcomes               | Overall survival<br><br>Progression free survival<br><br>Adverse events                                                                                                                                            | Patient-reported outcomes<br><br>Biomarker results<br><br>Safety results |
| Trial Design           | Randomised controlled trial (RCT)<br><br>Systematic reviews, meta-analyses, HTA Comments, letters, editorials<br>for screening of bibliographies only                                                              | Non-RCT<br><br>Non-systematic reviews                                    |
| Timeframe              | All publication years                                                                                                                                                                                              |                                                                          |
| Language restrictions  | English                                                                                                                                                                                                            | Non-English                                                              |

1

Appendix Table 4. Characteristics of randomised controlled trials included in the meta-analysis.

| Author        | Study name        | Year | Study type | Population                    | Sample size | Intervention             | Control   | PFS(month)         | ORR               | Adverse events    | PD-L1 assay      | PD-L1 positivity (%) |
|---------------|-------------------|------|------------|-------------------------------|-------------|--------------------------|-----------|--------------------|-------------------|-------------------|------------------|----------------------|
| Rini et al.   | KEYNOTE-426       | 2019 | RCT        | Advanced Renal-Cell Carcinoma | 861         | Pembrolizumab+Axitinib   | Sunitinib | 15.1 VS 11.1       | 59.3% VS 35.7%    | 75.8% VS 70.6%    | 22C3 (Dako)      | >1                   |
| Motzer et al. | JAVELIN Renal 101 | 2019 | RCT        | Advanced Renal-Cell Carcinoma | 886         | Avelumab+Axitinib        | Sunitinib | 13.8 VS 8.4        | 51.4% VS 25.7%    | 71.2% VS 71.5%    | SP-263 (Ventana) | >1                   |
| Motzer et al. | Immotion 151      | 2018 | RCT        | Advanced Renal-Cell Carcinoma | 915         | Atezolizumab+Bevacizumab | Sunitinib | 11.7 VS 6.1 VS 8.4 | 32% VS 25% VS 29% | 63% VS 40% VS 69% | SP-142 (Ventana) | >1                   |
| Motzer et al. | CheckMate 214*    | 2018 | RCT        | Advanced Renal-Cell Carcinoma | 1096        | Nivolumab+Ipilimumab     | Sunitinib | 11.6 VS 8.4        | 42% VS 27%        | 46% VS 63%        | 28-8 (Dako)      | >1                   |

\* The data were showed in patients with intermediate and poor risk

2  
3  
4  
5  
6  
7  
8  
9  
10  
11  
12

1  
2  
3

Appendix table 5: Parameters of parametric models for virtual time-to-event data,

| Trial names       | Treatment regimens       | Endpoint | Distribution                | Distribution information                                                               | AIC             |
|-------------------|--------------------------|----------|-----------------------------|----------------------------------------------------------------------------------------|-----------------|
| CheckMate 214     | Sunitinib                | PFS      | Log-logistic distribution   | shape:1.418<br>(se:0.0755),scale:39.5201<br>(se:2.6979)                                | AIC:<br>2371.48 |
|                   |                          | OS       | Log-logistic distribution   | shape:1.3424<br>(se:0.0857),scale:110.3086<br>(se:8.3993)                              | AIC:<br>2263.86 |
|                   | Nivolumab+ipilimumab     | PFS      | Royston-Parmar spline model | gamma0:-7.0412<br>(se:0.575),gamma1:2.6552<br>(se:0.2915),gamma2:0.1087<br>(se:0.0168) | AIC:<br>2423.88 |
|                   |                          | OS       | Log-normal distribution     | meanlog:5.3082<br>(se:0.1235),sdlog:1.5739<br>(se:0.1078)                              | AIC:<br>1815.59 |
| IMmotion 151      | Sunitinib                | PFS      | Log-logistic distribution   | shape:1.5605<br>(se:0.0742),scale:39.8611<br>(se:2.1885)                               | AIC:<br>3048.4  |
|                   |                          | OS       | Log-logistic distribution   | shape:1.1625<br>(se:0.074),scale:150.6874<br>(se:13.113)                               | AIC:<br>2428.62 |
|                   | Atezolizumab+bevacizumab | PFS      | Royston-Parmar spline model | gamma0:-7.6387<br>(se:0.6305),gamma1:2.4168<br>(se:0.2622),gamma2:0.134<br>(se:0.0256) | AIC:<br>2873.1  |
|                   |                          | OS       | Gamma distribution          | shape:1.1397<br>(se:0.0968),rate:0.0056 (se:8e-04)                                     | AIC:<br>2457.61 |
| JAVELIN Renal 101 | Sunitinib                | PFS      | Log-logistic distribution   | shape:1.2803<br>(se:0.0713),scale:35.26<br>(se:2.6486)                                 | AIC:<br>2190.07 |
|                   |                          | OS       | Log-logistic distribution   | shape:1.2323<br>(se:0.1256),scale:184.123<br>(se:30.9467)                              | AIC:<br>1007.01 |
|                   | Avelumab+axitinib        | PFS      | Royston-Parmar spline model | gamma0:-6.1074<br>(se:0.5327),gamma1:2.0208<br>(se:0.2675),gamma2:0.092<br>(se:0.0218) | AIC:<br>1942.39 |
|                   |                          | OS       | Exponential                 | rate:0.0029 (se:4e-04)                                                                 | AIC:            |



|                                                                                       |                        |     |                             |                                                                                        |                  |
|---------------------------------------------------------------------------------------|------------------------|-----|-----------------------------|----------------------------------------------------------------------------------------|------------------|
|                                                                                       |                        |     | distribution                |                                                                                        | 878.04           |
| KEYNOTE-426                                                                           | Sunitinib              | PFS | Log-logistic distribution   | shape:1.2474<br>(se:0.066),scale:35.9047<br>(se:2.5936)                                | AIC:<br>2530.73  |
|                                                                                       |                        | OS  | Log-logistic distribution   | shape:1.1708<br>(se:0.1083),scale:168.7267<br>(se:24.6514)                             | AIC:<br>1240.99  |
|                                                                                       | Pembrolizumab+axitinib | PFS | Royston-Parmar spline model | gamma0:-6.122<br>(se:0.5307),gamma1:2.0243<br>(se:0.2629),gamma2:0.0928<br>(se:0.0213) | AIC:<br>2216.74  |
|                                                                                       |                        | OS  | Exponential distribution    | rate:0.0024 (se:3e-04)                                                                 | AIC:<br>831.95   |
| Pooling data of CheckMate 214, KEYNOTE-426, IMmotion 151 and JAVELIN Renal 101 trials | Sunitinib              | PFS | Log-logistic distribution   | shape:1.3705<br>(se:0.0357),scale:37.5566<br>(se:1.2562)                               | AIC:<br>10134.28 |
|                                                                                       |                        | OS  | Log-logistic distribution   | shape:1.2800<br>(se:0.05),scale:135.14 (se:7.02)                                       | AIC:<br>6398.76  |

Abbreviations: AIC, Akaike information criterion.

- 1
- 2
- 3
- 4
- 5
- 6
- 7
- 8
- 9
- 10
- 11
- 12
- 13
- 14
- 15
- 16
- 17
- 18
- 19
- 20
- 21
- 22
- 23

1  
2  
3  
4  
5  
6  
7

Appendix Table 6. Cost (US \$) estimates (expected value [range]).

| Parameters                                       | United Kingdom                         | China                                   |
|--------------------------------------------------|----------------------------------------|-----------------------------------------|
| Price of sunitinib per 50 mg                     | 145.7 (72.87 - 145.7) <sup># 24</sup>  | 66 (33 - 66) <sup>#&amp;</sup>          |
| Price of ipilimumab per 50 mg                    | 4,875 (2,438 - 4,875) <sup>#15</sup>   | 4,655 (2328 - 7324) <sup>* #</sup>      |
| Price of nivolumab per 100 mg                    | 1,426 (713.1 - 1,426) <sup># 15</sup>  | 1362 (680.9 - 1362) <sup>#&amp;</sup>   |
| Price of avelumab per 200mg                      | 998 (499 - 998) <sup>#37</sup>         | 953 (477 - 953) <sup>*</sup>            |
| Price of pembrolizumab per 50mg                  | 6,838 (5,498 - 8,178) <sup>#38</sup>   | 2,635 (1,318 - 2,635) <sup>#&amp;</sup> |
| Price of axitinib per 10mg                       | 163 (82 - 163) <sup>#25</sup>          | 61 (30 - 61) <sup>#&amp;</sup>          |
| Price of atezolizumab per 1200mg                 | 4,950 (2,475 - 4,950) <sup>#39</sup>   | 3,141 (1,570 - 3,141) <sup>*</sup>      |
| Price of bevacizumab per 100mg                   | 300 (150 - 300) <sup>#40</sup>         | 284 (142 - 284) <sup>#&amp;</sup>       |
| Cost of follow-up and monitoring per cycle       | 75.78 (48.32 - 103.2) <sup>24</sup>    | 6.13 (4.9 - 8.58) <sup>26</sup>         |
| Cost of second-line active treatment per patient | 15,012 (14,793 - 15,231) <sup>24</sup> | 21,081 (11,927 - 26,628) <sup>26</sup>  |
| Cost of BSC per cycle                            | 88.23 (70.53 - 105.9) <sup>24</sup>    | 52.53 (49.1 - 69.21) <sup>30</sup>      |
| Cost of terminal care per patient                | 10,366 (8,566 - 12,849) <sup>19</sup>  | 1,893 (1564 - 2346) <sup>41</sup>       |
| Cost of managing AEs (grade ≥3) per event        |                                        |                                         |
| Fatigue                                          | 483.6 (0 - 967.2) <sup>29</sup>        | 110.3 (82.72 - 137.9) <sup>26</sup>     |
| Hypertension                                     | 27.3 (0 - 54.6) <sup>29</sup>          | 12.35 (9.26 - 15.44) <sup>26</sup>      |
| Anemia                                           | 3,242 (3,097 - 3,388) <sup>29</sup>    | 508.2 (381.2 - 635.3) <sup>26</sup>     |
| Palmar-plantar erythrodysesthesia                | 131.3 (98.48 - 164.1) <sup>25</sup>    | 15.21 (8.85 - 21.57) <sup>31</sup>      |
| Thrombocytopenia                                 | 4,927 (4,764 - 5,091) <sup>29</sup>    | 3,395 (2,546 - 4,244) <sup>26</sup>     |
| Cost of drug administration per unit             | 405.3 (304 - 506.7) <sup>15</sup>      | 17.65 (13.24 - 22.06) <sup>26</sup>     |

\* The prices were assumed by multiplying the price of ipilimumab in UK and the ratio of the price of nivolumab between UK and China.

&Local hospital charge.

# The ranges were assumed for sensitivity analysis.

8  
9  
10  
11  
12  
13  
14  
15  
16

1  
2  
3  
4  
5

Appendix Table 7. Summary of base-case cost (\$) and outcome results from the perspective of the National Health Service in UK.

| Strategy                              | Cost    | Overall LYs | QALYs | ICER*   |
|---------------------------------------|---------|-------------|-------|---------|
| Overall population                    |         |             |       |         |
| Sunitinib                             | 63,855  | 4.03        | 2.55  | NA      |
| Avelumab plus Axitinib                | 180,450 | 4.80        | 3.07  | 223,841 |
| Pembrolizumab plus Axitinib           | 190,046 | 5.96        | 3.71  | 108,825 |
| Nivolumab plus Ipilimumab             | 137,999 | 5.46        | 3.40  | 87,803  |
| Atezolizumab plus bevacizumab         | 122,316 | 4.26        | 2.73  | 330,607 |
| Population with PD-L1–positive tumors |         |             |       |         |
| Sunitinib                             | 62,266  | 3.48        | 2.24  | NA      |
| Avelumab plus Axitinib                | 186,684 | 4.08        | 2.71  | 267,240 |
| Pembrolizumab plus Axitinib           | 195,755 | 5.37        | 3.42  | 113,459 |
| Nivolumab plus Ipilimumab             | 158,249 | 5.90        | 3.82  | 60,866  |
| Atezolizumab plus bevacizumab         | 125,249 | 4.00        | 2.62  | 166,562 |
| Population with PD-L1–negative tumors |         |             |       |         |
| Sunitinib                             | 64,786  | 4.37        | 2.74  | NA      |
| Avelumab plus Axitinib                | 171,042 | 5.14        | 3.22  | 222,114 |
| Pembrolizumab plus Axitinib           | 173,547 | 5.96        | 3.65  | 119,124 |
| Nivolumab plus Ipilimumab             | 130,138 | 5.34        | 3.29  | 119,608 |
| Atezolizumab plus bevacizumab         | 120,948 | 4.59        | 2.90  | 350,504 |

\*Incremental cost per QALY ( versus sunitinib strategy)

6  
7  
8  
9  
10  
11  
12  
13  
14  
15  
16  
17  
18  
19  
20  
21  
22

1  
2  
3  
4  
5  
6

Appendix Table 8. Summary of base-case cost (\$) and outcome results from the perspective of Chinese health care perspectives.

| Strategy                              | Cost   | Overall LYs | QALYs | ICER*   |
|---------------------------------------|--------|-------------|-------|---------|
| Overall population                    |        |             |       |         |
| Sunitinib                             | 33,640 | 4.03        | 2.46  | NA      |
| Avelumab plus Axitinib                | 77,386 | 4.80        | 2.95  | 89,643  |
| Pembrolizumab plus Axitinib           | 88,562 | 5.96        | 3.54  | 50,742  |
| Nivolumab plus Ipilimumab             | 63,395 | 5.46        | 3.25  | 37,701  |
| Atezolizumab plus bevacizumab         | 62,987 | 4.26        | 2.62  | 176,050 |
| Population with PD-L1–positive tumors |        |             |       |         |
| Sunitinib                             | 32,551 | 3.48        | 2.16  | NA      |
| Avelumab plus Axitinib                | 78,586 | 4.08        | 2.60  | 105,165 |
| Pembrolizumab plus Axitinib           | 89,979 | 5.37        | 3.27  | 52,158  |
| Nivolumab plus Ipilimumab             | 67,570 | 5.90        | 3.64  | 23,740  |
| Atezolizumab plus bevacizumab         | 63,736 | 4.00        | 2.52  | 87,586  |
| Population with PD-L1–negative tumors |        |             |       |         |
| Sunitinib                             | 34,289 | 4.37        | 2.63  | NA      |
| Avelumab plus Axitinib                | 74,637 | 5.14        | 3.08  | 90,225  |
| Pembrolizumab plus Axitinib           | 82,518 | 5.96        | 3.48  | 56,674  |
| Nivolumab plus Ipilimumab             | 61,298 | 5.34        | 3.14  | 52,959  |
| Atezolizumab plus bevacizumab         | 62,811 | 4.59        | 2.78  | 189,232 |

\*Incremental cost per QALY ( versus sunitinib strategy)

7  
8  
9  
10  
11  
12  
13  
14  
15  
16  
17  
18  
19  
20  
21  
22

1  
2  
3  
4  
5

Appendix Table 9. Summary of Cost (\$) and Outcome Results at first three months.

| Strategy                              | Cost  | Overall LYs |
|---------------------------------------|-------|-------------|
| Overall population                    |       |             |
| Sunitinib                             | 10744 | 0.2445      |
| Avelumab plus Axitinib                | 37652 | 0.2455      |
| Pembrolizumab plus Axitinib           | 41815 | 0.2468      |
| Nivolumab plus Ipilimumab             | 52198 | 0.2463      |
| Atezolizumab plus bevacizumab         | 39281 | 0.2448      |
| Population with PD-L1–positive tumors |       |             |
| Sunitinib                             | 10832 | 0.2435      |
| Avelumab plus Axitinib                | 37883 | 0.2445      |
| Pembrolizumab plus Axitinib           | 42007 | 0.2462      |
| Nivolumab plus Ipilimumab             | 53019 | 0.2467      |
| Atezolizumab plus bevacizumab         | 39490 | 0.2444      |
| Population with PD-L1–negative tumors |       |             |
| Sunitinib                             | 10699 | 0.245       |
| Avelumab plus Axitinib                | 37421 | 0.246       |
| Pembrolizumab plus Axitinib           | 41461 | 0.2468      |
| Nivolumab plus Ipilimumab             | 51790 | 0.2462      |
| Atezolizumab plus bevacizumab         | 39124 | 0.2453      |

\*Incremental cost per QALY ( versus sunitinib strategy)

6
